# Supplementary material for: Detecting the Molecular System Signatures of Idiopathic Pulmonary Fibrosis through Integrated Genomic Analysis
Source: PubMed Central journal article supplement (PMC5431532; doi:10.1038/s41598-017-01765-6), 2017-05-08
Supplement: 41598_2017_1765_MOESM1_ESM.pdf [file 41598_2017_1765_MOESM1_ESM.pdf]

## Supplementary Information

### Detecting the Molecular System Signatures of Idiopathic Pulmonary Fibrosis through Integrated Genomic Analysis

Indu Gangwar<sup>1‡</sup>, Nitesh Kumar Sharma<sup>1‡</sup>, Ganesh Panzade<sup>1‡</sup>, Supriya Awasthi<sup>1</sup>, Anurag Agrawal<sup>2</sup>,  
Ravi Shankar<sup>1‡\*</sup>

#### Affiliations:

<sup>1</sup> Studio of Computational Biology & Bioinformatics, CSIR-IHBT, Palampur (HP), India.

<sup>2</sup> Lung Diseases Translational Research Group, CSIR-IGIB, Mall Road, Delhi, India.

<sup>3</sup> Academy of Scientific and Innovative Research (AcSIR), CSIR-Institute of Himalayan Bioresource Technology (CSIR-IHBT) Palampur (HP), India

<sup>‡</sup> Contributed Equally

*\*Corresponding Author: [ravish@ihbt.res.in](mailto:ravish@ihbt.res.in)*

## Supplementary Methods

### High throughput data and processing

Each microarray experiment's data was categorized into two classes, Normal and IPF individuals, while excluding all other specific condition. P-values were adjusted using Benjamini & Hochberg FDR. As in practice, genes with significant P-value ( $<0.05$ ) and  $-1 < \text{LogFC} > 1$  were considered as differentially expressed genes. Genes which displayed inconsistent and opposite expression status across the samples for any given condition were removed and only those genes were considered which exhibited single consistent trend in any given experiment for the given condition. This removed noise in the micro-array data. Z-score transformation of the expression data was done for all kind of platforms, in order to maintain a single comparable scale.

### Classification of IPF genes

For classification purpose, different datasets were created for training and testing using a support vector machine approach. A total of 159 IPF cases worked as positive samples while a total of 112 normal, sarcoidosis and NSIP cases were considered as negative non-IPF cases. For each considered gene set, samples were randomly distributed into training and testing model 10 times, each time yielding different training and testing set pair and model. This was done to ensure that the performance of the classifier was not biased towards only certain combination of samples.

Initially, 271 individuals were considered from five different IPF experiments (169 from Yang et al., 23 from Meltzer et al., 17 in Cho et al., 8 in Sanders et al. and 15 in Nance et al.), 27 from Sarcoidosis (Crouser et al. and Lockstone et al.) and 12 from NSIP (Yang et al.), making a total of 159 IPF and 112 non-IPF individuals. While building the training models, the non-IPF set also included 11 different Sarcoidosis individuals, and 6 NSIP individuals as a part of the non-IPF training dataset along with the control and normal individuals. The remaining 10 Sarcoidosis and 6 NSIP instances would go to the non-IPF test set. This way, 136 individuals having 80 IPF and 56

non-IPF individual were considered for building each model in a mutually exclusive manner in order to avoid any bias. To build random model for each, both the sets (A1 and A), 80 IPF samples were picked randomly as the positive set for the training set. The remaining 79 IPF instances were used as test set. Same was followed for non-IPF instances where 56 individuals were used as negative set for the training and remaining 56 non-IPF instances for testing. This kind of random selection based set pairs were created 10 times to build 10 different models using Radial basis function (RBF) kernel with optimized cost and gamma factors. Each of these models was tested over the corresponding test set.

LibSVM with RBF kernel and optimized cost and gamma factor was run. The models were checked for accuracy, sensitivity and specificity on different randomly generated test sets. Receiver Operator Characteristics plots with Area Under curve were made using ROCR<sup>1</sup> package of R. Matthews correlation coefficient (MCC) was calculated to measure perfection of SVM based classification.

Following equations were used to measure the classifier's performance:

$$\text{Sensitivity} = \left( \frac{TP}{TP+FN} \right) * 100$$

$$\text{Specificity} = \left( \frac{TN}{TN+FP} \right) * 100$$

$$\text{Accuracy} = \frac{TN+TP}{TP+TN+FP+FN}$$

$$\text{MCC} = \frac{(TP * TN) - (FP * FN)}{\sqrt{(TP+FP) * (TP+FN) * (TN+FP) * (TN+FN)}}$$

where TP= True Positive, TN= True Negative, FP=False Positive and FN= False Negative

Further system wide analysis was done for three datasets (SetA and SetB) as they were found to be most confident differentially expressed sets.

AUCs for above mentioned sets for each of the 10 instance-set pairs were evaluated and scored in the range of 0.92 to 0.99 (Supplementary Figure S6), clearly suggesting robust modeling of IPF by these gene-sets.

### **TRANSFAC and CHIP-Seq identified TF-target interactions**

Besides the manual curation, the approach for the identification of transcription factors involved two more methods: Scanning through 1) TRANSFAC v8.3 and 2) CHIP-seq data. Identification was done for both sets (SetA, B). The first method includes the identification of potentially TF regulated differentially expressed genes, their 2kb upstream promoter regions up to first exon were identified and were searched for transcription factor binding sites using PROMO 3.0. This tool incorporates TRANSFAC database (v8.3) having largest available collection of eukaryotic factor specific weight matrices. TFBS and transcription factor associated with them were identified on the basis of sequence similarity to the matrix. Similarity threshold of 85% was applied to obtain high quality results. The Second method was based on the availability of TF peaks data from regulatory map of transcription factor binding sites (ReMap) repository as it contains validated transcription factor CHIP-seq peak data from well-established repositories ENCODE and GEO. Available transcription factor peak bed files for all 237 transcription factors were downloaded from this repository and their binding was checked across the target genes in both the data sets using bedtools. Details related to the TF-target interactions in the regulation of differentially expressed genes is covered in supplementary Table S6 and list of identified TF is given in supplementary Table S7.

### **miRNA data**

So far three microarray studies have been published for miRNAs (GSE27430, GSE21394 and GSE32538). The study has been done using all these high-throughput studies and a RNA-seq study data. Details are covered in the main text.

### **Statistical significance of potential Feed-Forward loops**

Let suppose two edges E1 and E2 are connecting nodes N0 to N1 and N4 to N5, respectively. These

were chosen randomly and rewired such that nodes were swapped constructing edges  $E1 = (N0-N5)$  and  $E2 = (N4-N1)$ . P-value of significance was calculated as proportion of randomized networks having particular FFL count greater than or equal to its number in real network to the total number of randomized networks (1000 in our study).

### **Network properties of gene regulatory network in IPF**

Degree of a vertex/node in the network is the number of edges connecting to it. High degree nodes are characterized as hub nodes in the network. Centrality estimates the importance of node in a network. Betweenness centrality of a node is defined as the total occurrences of node in form of a bridge across shortest path of two other nodes. Farness of a node is a measure of sum of distances of the node with all other nodes and reciprocal of it is defined as the closeness centrality of the node. Tendency of a node in a graph to remain clustered together is referred as clustering coefficient whereas average shortest path length is described as mean value of steps through shortest paths of all potential node pairs of network. Indegree and outdegree terms are defined for directed networks in form of edges converging towards the node and diverging from the node respectively.

### **Supplementary discussion**

#### **IPF specific GRN**

IPF associated TF-miRNAs mediated regulatory networks were reconstructed via merging of significant potential FFLs. 15 differentially downregulated genes and 18 differentially upregulated genes were observed regulated by both TFs and miRNAs, forming network motifs in Set A. 22 upregulated miRNAs and 19 downregulated miRNAs in IPF were found regulating IPF DEGs via association with 42 TFs incorporating 16 DETFs in IPF (CSRNP1, NFE2, AFF3, BHLHE22, HOPX, ID1, JUN, KLF6, MYB, MYOCD, SIX1, SIX4, SMAD6, SOX2, TFAP2A and TP63) (Supplementary Figure S11). Upregulated DEGs forming significant potential FFLs in these sets

were enriched in ECM receptor interaction, p53 signaling pathway, ABC transporters and cell adhesion molecules (CAMs). The downregulated DEGs were found enriched in fatty acid metabolism and AMPK signaling pathways. Enhanced extracellular matrix deposition and cell adhesion was observed as a characteristic feature of IPF lungs. Previous studies had reported p53 upregulation causing G1 arrest of cell cycle combining chronic DNA damage in IPF disease condition<sup>33</sup>. Fatty acid metabolism affects function of alveolar epithelial cells, which are responsible for maintaining lung homeostasis. Its deficiency stimulates lung injury in bleomycin induced mice resulted in induction of apoptosis and TGF- $\beta$  expression<sup>34</sup>. All these previous observations concur with the findings here.

**Table S1:** Accuracy, sensitivity, specificity and MCC values for sets A1 and A in contrast to ten different random models

| <b>Set A</b>                                                   |                  |                  |                  |                  |                  |                    |                    |                  |                  |                   |
|----------------------------------------------------------------|------------------|------------------|------------------|------------------|------------------|--------------------|--------------------|------------------|------------------|-------------------|
|                                                                | <b>TP</b>        | <b>FN</b>        | <b>FP</b>        | <b>TN</b>        | <b>Accuracy</b>  | <b>Sensitivity</b> | <b>Specificity</b> | <b>MCC</b>       |                  |                   |
| <b>Shuffle 1</b>                                               | 78               | 2                | 6                | 50               | 94.12            | 97.5               | 89.29              | 0.88             |                  |                   |
| <b>Shuffle 2</b>                                               | 78               | 2                | 5                | 51               | 94.85            | 97.5               | 91.07              | 0.89             |                  |                   |
| <b>Shuffle 3</b>                                               | 76               | 4                | 8                | 48               | 91.18            | 95                 | 85.71              | 0.82             |                  |                   |
| <b>Shuffle 4</b>                                               | 77               | 3                | 4                | 52               | 94.85            | 96.25              | 92.86              | 0.89             |                  |                   |
| <b>Shuffle 5</b>                                               | 78               | 2                | 8                | 48               | 92.65            | 97.5               | 85.71              | 0.85             |                  |                   |
| <b>Shuffle 6</b>                                               | 78               | 2                | 7                | 49               | 93.38            | 97.5               | 87.5               | 0.86             |                  |                   |
| <b>Shuffle 7</b>                                               | 75               | 5                | 10               | 46               | 88.97            | 93.75              | 82.14              | 0.77             |                  |                   |
| <b>Shuffle 8</b>                                               | 80               | 0                | 7                | 49               | 94.85            | 100                | 87.5               | 0.9              |                  |                   |
| <b>Shuffle 9</b>                                               | 77               | 3                | 11               | 45               | 89.71            | 96.25              | 80.36              | 0.79             |                  |                   |
| <b>Shuffle 10</b>                                              | 79               | 1                | 9                | 47               | 92.65            | 98.75              | 83.93              | 0.85             |                  |                   |
| <b>Set A1</b>                                                  |                  |                  |                  |                  |                  |                    |                    |                  |                  |                   |
|                                                                | <b>TP</b>        | <b>FN</b>        | <b>FP</b>        | <b>TN</b>        | <b>Accuracy</b>  | <b>Sensitivity</b> | <b>Specificity</b> | <b>MCC</b>       |                  |                   |
| <b>Shuffle 1</b>                                               | 76               | 4                | 11               | 45               | 88.97            | 95                 | 80.36              | 0.77             |                  |                   |
| <b>Shuffle 2</b>                                               | 72               | 8                | 9                | 47               | 87.5             | 90                 | 83.93              | 0.74             |                  |                   |
| <b>Shuffle 3</b>                                               | 73               | 7                | 7                | 49               | 89.71            | 91.25              | 87.5               | 0.79             |                  |                   |
| <b>Shuffle 4</b>                                               | 77               | 3                | 8                | 48               | 91.91            | 96.25              | 85.71              | 0.83             |                  |                   |
| <b>Shuffle 5</b>                                               | 79               | 1                | 9                | 47               | 92.65            | 98.75              | 83.93              | 0.85             |                  |                   |
| <b>Shuffle 6</b>                                               | 76               | 4                | 12               | 44               | 88.24            | 95                 | 78.57              | 0.76             |                  |                   |
| <b>Shuffle 7</b>                                               | 78               | 2                | 5                | 51               | 94.85            | 97.5               | 91.07              | 0.89             |                  |                   |
| <b>Shuffle 8</b>                                               | 76               | 4                | 7                | 49               | 91.91            | 95                 | 87.5               | 0.83             |                  |                   |
| <b>Shuffle 9</b>                                               | 80               | 0                | 11               | 45               | 91.91            | 100                | 80.36              | 0.84             |                  |                   |
| <b>Shuffle 10</b>                                              | 76               | 4                | 6                | 50               | 92.65            | 95                 | 89.29              | 0.85             |                  |                   |
| <b>Accuracy Result in GSE35147 (Only involved in Test Set)</b> |                  |                  |                  |                  |                  |                    |                    |                  |                  |                   |
|                                                                | <b>Shuffle 1</b> | <b>Shuffle 2</b> | <b>Shuffle 3</b> | <b>Shuffle 4</b> | <b>Shuffle 5</b> | <b>Shuffle 6</b>   | <b>Shuffle 7</b>   | <b>Shuffle 8</b> | <b>Shuffle 9</b> | <b>Shuffle 10</b> |
| <b>Set A</b>                                                   | 100              | 100              | 87.5             | 100              | 100              | 100                | 87.5               | 100              | 75               | 100               |
| <b>Set A1</b>                                                  | 100              | 75               | 100              | 87.5             | 100              | 100                | 87.5               | 87.5             | 100              | 75                |

**Table S2:** Functional role and status of Set A DEGs in IPF

| Gene Name              | Status in IPF | Role in IPF                                                                                                                                                                                                                                                                                                                                                                    |
|------------------------|---------------|--------------------------------------------------------------------------------------------------------------------------------------------------------------------------------------------------------------------------------------------------------------------------------------------------------------------------------------------------------------------------------|
| Caveolin-2<br>(CAV1/2) | Down          | It is a membrane protein which is present in lung fibroblasts and suppress TGF $\beta$ induced ECM production but in case of IPF, its decrease causes excessive TGF $\beta$ induced ECM production.                                                                                                                                                                            |
| CBS                    | Down          | It regulates homocysteine in plasma membrane and deficiency of CBS genes in mouse model already published as one of cause of fibrosis and inflammation                                                                                                                                                                                                                         |
| CDH3                   | Up            | It works as a molecular target in various cancer like pancreatic, colorectal and gastric cancer <sup>2</sup> . Upregulation of this gene supports the proliferation and adhesion in IPF lungs                                                                                                                                                                                  |
| SFRP2                  | Up            | Secreted frizzled related protein 2 works as inhibitor of Wnt signaling pathway and upregulation of this gene inhibits BMP2 gene which is a key factor in collagen maturation and biosynthesis during injury condition <sup>3</sup>                                                                                                                                            |
| COL14A1                | Up            | It is a type of collagen, a member of the FACIT (fibril-associated collagen with interrupted triple helices) collagen family. This protein interacts with fibril surface and is directly involved in the regulation of fibrillogenesis.                                                                                                                                        |
| COMP                   | Up            | Cartilage oligomeric matrix protein (COMP) is a non-collagenous ECM protein, knockdown of this gene inhibits cell proliferation which shows direct impact of this gene under IPF condition <sup>4</sup>                                                                                                                                                                        |
| CXCL14                 | Up            | Production of CXCL14 is done by macrophages, fibrotic loci and type 2 alveolar epithelial cells, it's a mucosal chemokine which recruits many immune cell on mucosa to prevent a cell against foreign particle working as an anti-microbial gene <sup>5</sup>                                                                                                                  |
| DCLK1                  | Up            | Doublecortin-like kinase 1 (DCLK1) is a member of kinase superfamily and worked as marker for cancer stem cell and directly involved in epithelial-mesenchymal transition to enhance it which is also a key phenotype of IPF <sup>6</sup>                                                                                                                                      |
| DIO2                   | Up            | Deiodinase iodothyronine type II (dio2) is a member of iodothyronine family which activates thyroid hormone by converting the prohormone thyroxin. From the study, it was found that upregulation of this gene changes in signaling of thyroid hormone which may play a role in development and progression of IPF but direct involvement was not observed in IPF <sup>7</sup> |
| EPB41L5                | Down          | Down regulated Erythrocyte membrane protein band 4.1 like 5 (EPB41L5) is used as a biomarker for idiopathic pulmonary fibrosis <sup>8</sup>                                                                                                                                                                                                                                    |
| FAM167A                | Down          | Downregulation of FAM167A is a novel finding discovery in this study and was found regulated by miR-27a and transcription factors (ATF3 and VDR). Previous                                                                                                                                                                                                                     |



|        |      |                                                                                                                                                                                                                                                           |
|--------|------|-----------------------------------------------------------------------------------------------------------------------------------------------------------------------------------------------------------------------------------------------------------|
|        |      | studies reported that FAM167A is involved in sclerosis, a specific type of fibrosis, where fibrous deposition in an area occurs which has some sort of flexibility or movement like skin                                                                  |
| FZD5   | Down | Frizzled class receptor 5 (FZD5) encodes 7-transmembrane domain protein that are receptors for Wnt signaling believed to be the receptor for Wnt5a ligand and downregulation of this gene reduces the angiogenesis <sup>9</sup>                           |
| HMGCR  | Down | It is a rate limiting factor for fatty acid biosynthesis, and downregulation of this enzyme leads to downregulation of fatty acid biosynthesis.                                                                                                           |
| IGFBP4 | Up   | Elevated expression of Insulin-like growth-factor-binding proteins (IGFBP4) shows inhibitory effect on canonical Wnt signaling which plays a crucial role in IPF                                                                                          |
| KCNMA1 | Up   | Potassium calcium-activated channel subfamily M alpha 1 (KCNMA1) was found to act as muscle relaxant. In IPF condition its expression was elevated and altering lungs muscle cell tone.                                                                   |
| KRT17  | Up   | Upregulated Keratin 17 involved in tissue repair and formation and maintenance of various skin appendages by regulating protein synthesis and epithelial cell growth through binding to the adapter protein SFN.                                          |
| LTBP1  | Up   | Latent TGF $\beta$ protein-1 (LTBP1) was found up-regulated in our study. A previously reported study suggested that alteration of TGF- $\beta$ pathways alters the extracellular matrix composition in fibrotic lung <sup>10</sup>                       |
| MMP16  | Up   | Matrix metalloproteinase 16 (MMP16) was found upregulated and has an important involvement in the breakdown of ECM in normal physiological processes, like tissue remodeling, reproduction and embryonic development as well as in chronic lung diseases. |
| PAMR1  | Up   | Peptidase domain containing associated with muscle regeneration 1 (PAMR1) function is not very well defined but it was upregulated and it is believed that it may play an important role in formation of skeletal muscle.                                 |
| PCDH7  | Up   | Protocadherin (PCDH7) belongs to cadherin super family and have role in cell-cell recognition and adhesion. Increased expression of this gene supports elevated cell adhesion process in IPF.                                                             |
| Thy-1  | Up   | Thy-1 was found upregulated and it is a glycoprotein encoded by cell surface antigens and elevates cell adhesion and cell communication.                                                                                                                  |

**Table S3:** Differentially expressed TF-target interaction analysis for Set A and Set B genes.

| <b>TF- target interaction analysis for a Set B genes</b> |                        |                      |              |                                                                                                                                                             |                                                                                                             |
|----------------------------------------------------------|------------------------|----------------------|--------------|-------------------------------------------------------------------------------------------------------------------------------------------------------------|-------------------------------------------------------------------------------------------------------------|
| Differentially expressed genes                           | Correlation $\geq 0.7$ | TF                   | Target gene  | Pathways identified from target enrichment p-value                                                                                                          | GO-terms P-value                                                                                            |
| up-regulated (468)                                       | 2037 interactions      | 11                   | 381          | ECM-receptor interaction-(p=1.66E-11)<br>integrin family cell surface interactions-(p=7.86E-16)<br>Focal adhesion-(p=5.01E-10)<br>IGF1 pathway-(p=8.02E-12) | Cell adhesion-(p=2.00E-12)<br>ECM organization-(p=1.50E-12)<br>Growth factor binding-(p=6.40E-05)           |
| down-regulated (269)                                     | 1721 interactions      | 13                   | 241          | Metabolic pathway-(p=2.33E-06)<br>Endocytosis-(p=7.42E-06)                                                                                                  | Immune system process-(p=1.17E-05)<br>response to wounding (p=1.08E-06)<br>RAGE receptor binding-(p=0.0118) |
| <b>TF- target interaction analysis for a Set A genes</b> |                        |                      |              |                                                                                                                                                             |                                                                                                             |
| Differentially expressed genes                           | Correlation $\geq 0.7$ | Transcription Factor | Target genes | Pathways identified from target enrichment -P value                                                                                                         | GO terms P-value                                                                                            |
| up-regulated (22)                                        | 132 interactions       | 11                   | 21           | TGF- $\beta$ signaling pathway (p=0.0008)                                                                                                                   | Cell adhesion(p=0.0317)                                                                                     |
| down-regulated (17)                                      | 110 interactions       | 13                   | 15           | Metabolic pathways (p=0.0005)<br>Metabolism of lipids and lipoproteins (p= 0.0001)                                                                          | Sterol biosynthetic process(p=7.68e-06)                                                                     |

**Table S4:** Differentially expressed up-regulated TF classification and role in IPF

| <b>Transcription factor</b>             | <b>Class</b>                                    | <b>Family</b>                       | <b>Expression in study</b> | <b>Function</b>                           | <b>Target Involvement in up-regulated pathways associated with IPF identified in study</b>               | <b>Target genes GO enriched terms associated with IPF identified in study</b> | <b>role in IPF</b>                                                                                                  |
|-----------------------------------------|-------------------------------------------------|-------------------------------------|----------------------------|-------------------------------------------|----------------------------------------------------------------------------------------------------------|-------------------------------------------------------------------------------|---------------------------------------------------------------------------------------------------------------------|
| SOX2- Sex Determining Region Y -Box 2   | High mobility group domain (HMG) domain factors | SOX-related factors                 | up-regulated               | proliferation and differentiation         | beta1 integrin cell surface interactions, SIP1 pathway, ECM receptor interaction pathway                 | Cell adhesion, ECM organization.                                              | Imbalanced activity of airway epithelial cells, results in formation of alveolar lesions in IPF <sup>11</sup>       |
| SOX4- Sex Determining Region Y -Box 4   | High mobility group domain (HMG) domain factors | SOX-related factors                 | up-regulated               | mesenchymal cell expression               | ECM-receptor interaction, Focal adhesion pathway, beta1 integrin cell surface interactions, SIP1 pathway | Cell adhesion, ECM organization, growth factor binding                        | Higher expression is responsible for mesenchymal formation from EMT <sup>12</sup>                                   |
| EBF1- Early-B-cell related factor       | Rel Homology Region factors                     | Early B-Cell Factor-related factors | up-regulated               | differentiation and maturation of B-cells | ECM-receptor interaction, Focal adhesion pathway                                                         | Cell adhesion, ECM organization, growth factor binding                        | B-cell aggregation <sup>13</sup>                                                                                    |
| SIX1- Sine oculis homeobox-1            | Homeo domain factors                            | HD-SINE factors                     | up-regulated               | mesenchymal cell formation                | beta1 integrin cell surface interactions, IGF1 pathway                                                   | Cell adhesion, ECM organization                                               | Higher expression is responsible for EMT transitions <sup>14</sup>                                                  |
| SIX4- Sine oculis homeobox-4            | Homeo domain factors                            | HD-SINE factors                     | up-regulated               | cell proliferation                        | beta1 integrin cell surface interactions, signaling events mediated by focal adhesion kinase             | Cell adhesion, ECM organization                                               | Higher expression enhances the myofibroblast differentiation <sup>15</sup>                                          |
| TFAP2A- Transcription factor AP-2-alpha | Basic helix-span-helix factors                  | AP-2 factors                        | up-regulated               | cell growth and differentiation           | ECM-receptor interaction, Focal adhesion, beta1 integrin cell surface interactions                       | Cell adhesion, ECM organization, growth factor binding                        | upregulation of TFAP2A promotes cell differentiation and important role in TGF-beta induced signaling <sup>16</sup> |
| MYOCD- Myocardin                        | Basic-helix-loop-helix factors                  | ASC-related factors                 | up-regulated               | Cell proliferation and differentiation    | ECM receptor interaction, Focal adhesion, beta1 integrin cell                                            | Cell adhesion, ECM organization,                                              | Progressive and irreversible scarring of lung tissue <sup>17</sup>                                                  |

|                                                   |                                       |                         |              |                                       |                                                                                    |                                                        |                                                                                                                                                       |
|---------------------------------------------------|---------------------------------------|-------------------------|--------------|---------------------------------------|------------------------------------------------------------------------------------|--------------------------------------------------------|-------------------------------------------------------------------------------------------------------------------------------------------------------|
|                                                   | (Bhlh)                                |                         |              | on                                    | surface interactions                                                               | growth factor binding                                  |                                                                                                                                                       |
| TP63-Tumor suppressor protein 63                  | P53 domain factors                    | P53 related factors     | up-regulated | cell proliferation                    | ECM receptor interaction, Focal adhesion, beta1 integrin cell surface interactions | Cell adhesion, ECM organization, growth factor binding | Disordered proliferation of epithelial cells results in squamous metaplasia as one of the classified form of honeycomb structure in IPF <sup>18</sup> |
| TRIM29-Tripartite motif-containing protein29      | C2H2 zinc finger factors              | Trim-family             | up-regulated | cell proliferation and transformation | ECM receptor interaction, Focal adhesion, P53 signaling pathway                    | ECM organization, ECM assembly, growth factor binding  | Higher expression results in inhibition of apoptosis <sup>19</sup>                                                                                    |
| MYB-Transcription I activator Myb                 | Tryptophan cluster factors            | Myb/SANT domain factors | up-regulated | cell proliferation                    | ECM receptor interaction, Focal adhesion, beta1 integrin cell surface interactions | Cell adhesion, ECM organization, growth factor binding | Enhance myofibroblast formation and differentiation from ECM transition <sup>20</sup>                                                                 |
| BHLHE22-Class E basic helix-loop-helix protein 22 | Basic-helix-loop-helix factors (Bhlh) | Tal- related factors    | up-regulated | cell proliferation                    | ECM receptor interaction, Focal adhesion, beta1 integrin cell surface interactions | Cell adhesion, ECM organization, growth factor binding | Higher expression is responsible for enhance cell proliferation                                                                                       |

**Table S5:** Differentially expressed down-regulated TF classification and role in IPF

| <b>Transcription factor</b> | <b>Description</b>                   | <b>Class</b>                          | <b>Family</b>             | <b>Expression in study</b> | <b>Function</b>                      | <b>Involvement in down-regulated pathways associated with IPF identified in study</b> | <b>GO enriched terms associated with IPF identified in study</b> | <b>role in IPF</b>                                                     |
|-----------------------------|--------------------------------------|---------------------------------------|---------------------------|----------------------------|--------------------------------------|---------------------------------------------------------------------------------------|------------------------------------------------------------------|------------------------------------------------------------------------|
| CEBPD                       | CCAAT/enhancer binding protein delta | Basic leucine zipper factors (bZIP)   | C/EBP family              | down-regulated             | tumor suppressor function            | Metabolic pathways, Endocytosis                                                       | Response to wounding, RAGE receptor binding                      | enhance fibroblast proliferation <sup>21</sup>                         |
| CSRNP1                      | Cysteine rich nuclear protein        | AXUD/CSRNP domain factors             | CSRNP factors             | down-regulated             | tumor suppressor function            | Metabolic pathways, Endocytosis                                                       | Response to stress, response to wounding                         | Down-regulation inhibits tumor suppression activity <sup>22,23</sup>   |
| FOSL2                       | FOSL2                                | Basic leucine zipper factors (bZIP)   | Fos-related factors       | down-regulated             | cellular proliferation               | Metabolic pathways, Endocytosis                                                       | Response to stress, response to wounding                         | Down-regulation inhibits its anti-proliferation activity <sup>24</sup> |
| HIF3A                       | Hypoxia-inducible factor-3-alpha     | Basic-helix-loop-helix factors (Bhlh) | PAS domain factors        | down-regulated             | mediates oxidative stress            | Metabolic pathways, Endocytosis                                                       | Response to stress, response to wounding                         | Down-regulation leads to hypoxia induce damage <sup>25</sup>           |
| HOPX                        | Homeodomain-only protein             | Homeo domain factors                  | Paired-related HD factors | down-regulated             | developing pulmonary airway          | Endocytosis, Metabolic pathways                                                       | Response to chemical stimulus, RAGE receptor binding             | Down-regulation lead to alveolar damage <sup>26</sup>                  |
| ID1                         | Inhibitors of Differentiation        | Basic-helix-loop-helix factors (Bhlh) | ID family                 | down-regulated             | inhibits differentiation             | Endocytosis, Metabolic pathways                                                       | Response to wounding, RAGE receptor binding                      | Down-regulation induces impairment and fibrosis <sup>27</sup>          |
| JUN                         | Jun                                  | Basic leucine zipper factors (bZIP)   | Jun-related factors       | down-regulated             | cell cycle progression and apoptosis | Endocytosis, Metabolic pathways                                                       | Response to stimulus, regulation of catalytic activity           | Down-regulation induces reduction in apoptosis <sup>24</sup>           |
| KLF6                        | Kruppel -                            | C2H2                                  | Three-zinc                | down-                      | differentiation                      | Endocytosis,                                                                          | Response                                                         | dysregulation of                                                       |

|             |                                          |                                      |                                           |                |                                                                                    |                                 |                                                                    |                                                                                           |
|-------------|------------------------------------------|--------------------------------------|-------------------------------------------|----------------|------------------------------------------------------------------------------------|---------------------------------|--------------------------------------------------------------------|-------------------------------------------------------------------------------------------|
|             | like factor 6                            | zinc finger factors                  | finger Kruppel-related factors            | regulated      | on and apoptosis                                                                   | Metabolic pathway               | to stimulus, oxidoreductase activity                               | apoptosis in vasculature in IPF <sup>28</sup>                                             |
| KLF9        | Kruppel- like factor 9                   | C2H2 zinc finger factors             | Three-zinc finger Kruppel-related factors | down-regulated | Regulates cell proliferation, B-cell proliferation, apoptosis                      | Endocytosis, Metabolic pathways | Response to stress, response to wounding                           | Down-regulation inhibits its apoptotic activity.                                          |
| KLF15       | Kruppel- like factor 15                  | C2H2 zinc finger factors             | Three-zinc finger Kruppel-related factors | down-regulated | Cellular proliferation inhibition                                                  | Endocytosis, Metabolic pathway  | Cellular response to stimulus, carbohydrate binding                | Down-regulation inhibits its role as novel inhibitor of VSMCs proliferation <sup>29</sup> |
| NFE2        | Nuclear factor erythroid 2               | Basic leucine zipper factors (bZIP)  | Jun-related factors                       | down-regulated | Regulation of megakaryocytic differentiation and regulation of platelet production | Endocytosis, Metabolic pathways | Immune system process, response to wounding, RAGE receptor binding | Down-regulation results in dysregulation of platelet production <sup>30</sup>             |
| SMAD6/MADH6 | Mother against decapentaplegic homolog 6 | SMAD/NF-1 DNA-binding domain factors | SMAD factors                              | down-regulated | repressor activity                                                                 | Endocytosis, Metabolic pathways | Response to stimulus, oxidoreductase activity                      | Down-regulation inhibits its antifibrotic activity <sup>31</sup>                          |
| AFF3        | AFF3/LAF4                                | NA                                   | AF4/FMR2 family member 3                  | down-regulated | Lymphoid development and oncogenesis                                               | Endocytosis, Metabolic pathways | Response to external stimulus, oxidoreductase activity             | Downregulation results in decreased lymphocyte signaling <sup>32</sup>                    |

**Table S6:** Transcription factor-target analysis using Promo (transfac v8.3) and ReMap

| <b>TF-target interaction analysis using PROMO for a Set A genes</b> |                                                                     |                             |                     |
|---------------------------------------------------------------------|---------------------------------------------------------------------|-----------------------------|---------------------|
| <b>Differentially expressed genes</b>                               | <b>TF-target interactions<br/>Correlation <math>\geq 0.7</math></b> | <b>Transcription Factor</b> | <b>Target Genes</b> |
| up-regulated (22)                                                   | 294 interactions                                                    | 30                          | 20                  |
| down-regulated (17)                                                 | 152 interactions                                                    | 24                          | 15                  |
| <b>TF-target interaction analysis using PROMO for a Set B genes</b> |                                                                     |                             |                     |
| up-regulated (468)                                                  | 4103 interactions                                                   | 34                          | 375                 |
| down-regulated (269)                                                | 2976 interactions                                                   | 34                          | 230                 |
| <b>TF-target interaction analysis using ReMap for a Set A genes</b> |                                                                     |                             |                     |
| <b>Differentially expressed genes</b>                               | <b>TF-target interactions<br/>Correlation <math>\geq 0.7</math></b> | <b>Transcription Factor</b> | <b>Target Genes</b> |
| up-regulated (22)                                                   | 325 interactions                                                    | 78                          | 21                  |
| down-regulated (17)                                                 | 297 interactions                                                    | 68                          | 14                  |
| <b>TF-target interaction analysis using ReMap for a Set B genes</b> |                                                                     |                             |                     |
| up-regulated (468)                                                  | 4748 interactions                                                   | 97                          | 343                 |
| down-regulated (269)                                                | 4775 interactions                                                   | 95                          | 222                 |

**Table S7: List of TF regulating differentially expressed genes** (A total 107 TFs were identified from both methods (TRANSFAC and CHIP-Seq). Enrichment analysis of their target genes showed the involvement of similar pathways as well as the involvement of same biological and molecular functions as identified in case of differentially expressed transcription factors.)

|         |        |          |             |         |
|---------|--------|----------|-------------|---------|
| AR      | EZH2   | LEF1     | RFX5        | VDR     |
| ATF1    | FLI1   | MAFF     | RUNX1       | WT1     |
| ATF3    | FOS    | MAFK     | RUNX1T1     | XBP1    |
| ATRX    | FOSL1  | MEF2C    | RUNX2       | ZEB1    |
| BACH1   | FOXA1  | MEIS1    | SMAD1       | ZKSCAN1 |
| BCL11A  | FOXA2  | MTA3     | SMC1A       | ZNF143  |
| BCL3    | FOXM1  | MYC      | SMC3        | ZNF217  |
| BCL6    | FOXP2  | NANOG    | SMC4        |         |
| BHLHE40 | GABPA  | NCOR2    | SNAPC1      |         |
| BRCA1   | GATA2  | NFATC1   | SNAPC5      |         |
| CDK8    | GATA3  | NFATC2   | SPI1        |         |
| CEBPA   | GATA6  | NFKB1    | SRF         |         |
| CEBPB   | GREB1  | NKX2-1   | STAT1       |         |
| CHD1    | HDAC2  | NOTCH1   | STAT2       |         |
| CHD2    | HMGN3  | NR2F1    | STAT4       |         |
| EGR1    | HNF1B  | PAX5     | SUZ12       |         |
| EGR3    | HNF4G  | PML      | TAF1        |         |
| ELF5    | HOXD10 | POU5F1   | TAL1        |         |
| EOMES   | IKZF1  | PPARG    | TCF4/TCF7L2 |         |
| ERG     | IRF1   | PPARGC1A | NR2F2       |         |
| ESR1    | IRF4   | PRDM1    | TEAD4       |         |
| ESR2    | JUNB   | RAD21    | TFAP2C      |         |
| ETS1    | JUND   | RARB     | THAP1       |         |
| ETS2    | KDM5B  | RBPJ     | TP53        |         |
| ETV1    | KLF4   | RCOR1    | USF1        |         |



**Table S8:** Novel, overlapping and contradictory set of DE miRNAs during IPF

| <b>Novel miRNAs</b>                                                                                                                                                                                                                                                                                                                                                                                                                                                                                                       |                                                                                                                                                                                                                                                                                                                                                                                                                                                                                                                                                                                                                                                                                                                                                                    |
|---------------------------------------------------------------------------------------------------------------------------------------------------------------------------------------------------------------------------------------------------------------------------------------------------------------------------------------------------------------------------------------------------------------------------------------------------------------------------------------------------------------------------|--------------------------------------------------------------------------------------------------------------------------------------------------------------------------------------------------------------------------------------------------------------------------------------------------------------------------------------------------------------------------------------------------------------------------------------------------------------------------------------------------------------------------------------------------------------------------------------------------------------------------------------------------------------------------------------------------------------------------------------------------------------------|
| <b>Upregulated</b>                                                                                                                                                                                                                                                                                                                                                                                                                                                                                                        | <b>Downregulated</b>                                                                                                                                                                                                                                                                                                                                                                                                                                                                                                                                                                                                                                                                                                                                               |
| hsa-let-7c, hsa-miR-23b, hsa-miR-34a, hsa-miR-34c-3p, hsa-miR-34c-5p, hsa-miR-100, hsa-miR-133a, hsa-miR-135b, hsa-miR-302d, hsa-miR-328, hsa-miR-363, hsa-miR-429, hsa-miR-567, hsa-miR-634, hsa-miR-921, hsa-miR-1249                                                                                                                                                                                                                                                                                                   | hsa-let-7d, hsa-let-7i, hsa-miR-28-3p, hsa-miR-33b, hsa-miR-139-3p, hsa-miR-146a, hsa-miR-342-3p, hsa-miR-346, hsa-miR-486-5p, hsa-miR-550, hsa-miR-580, hsa-miR-593, hsa-miR-601, hsa-miR-623, hsa-miR-627, hsa-miR-632, hsa-miR-636, hsa-miR-638, hsa-miR-641, hsa-miR-671-5p, hsa-miR-874, hsa-miR-877, hsa-miR-933, hsa-miR-939, hsa-miR-1228, hsa-miR-1287                                                                                                                                                                                                                                                                                                                                                                                                    |
| <b>Previously known miRNAs</b>                                                                                                                                                                                                                                                                                                                                                                                                                                                                                            |                                                                                                                                                                                                                                                                                                                                                                                                                                                                                                                                                                                                                                                                                                                                                                    |
| <b>Upregulated</b>                                                                                                                                                                                                                                                                                                                                                                                                                                                                                                        | <b>Downregulated</b>                                                                                                                                                                                                                                                                                                                                                                                                                                                                                                                                                                                                                                                                                                                                               |
| hsa-miR-1, hsa-miR-10a*, hsa-miR-21, hsa-miR-31, hsa-miR-31*, hsa-miR-34b, hsa-miR-99a, hsa-miR-125b, hsa-miR-132, hsa-miR-133b, hsa-miR-143, hsa-miR-148a, hsa-miR-154, hsa-miR-155, hsa-miR-199a-5p, hsa-miR-199b-5p, hsa-miR-205, hsa-miR-214, hsa-miR-214*, hsa-miR-299-5p, hsa-miR-376a, hsa-miR-376b, hsa-miR-376c, hsa-miR-377, hsa-miR-379, hsa-miR-381, hsa-miR-382, hsa-miR-409-3p, hsa-miR-410, hsa-miR-411, hsa-miR-487b, hsa-miR-493*, hsa-miR-495, hsa-miR-509-5p, hsa-miR-539, hsa-miR-650, hsa-miR-654-3p | hsa-let-7b, hsa-let-7g, hsa-miR-17, hsa-miR-18a, hsa-miR-23a, hsa-miR-27a, hsa-miR-29c, hsa-miR-30a, hsa-miR-30b//hsa-miR-30b*, hsa-miR-30c-1*, hsa-miR-30c-2*, hsa-miR-30d, hsa-miR-30e, hsa-miR-33a, hsa-miR-92a, hsa-miR-93, hsa-miR-106b, hsa-miR-125a-3p, hsa-miR-126, hsa-miR-141, hsa-miR-151-3p, hsa-miR-181a, hsa-miR-181b, hsa-miR-181d, hsa-miR-184, hsa-miR-191, hsa-miR-203, hsa-miR-193-3p, hsa-miR-210, hsa-miR-221, hsa-miR-221*, hsa-miR-222, hsa-miR-223, hsa-miR-224, hsa-miR-320a, hsa-miR-326, hsa-miR-342-5p, hsa-miR-345, hsa-miR-362-5p, hsa-miR-375, hsa-miR-378, hsa-miR-422a, hsa-miR-423-5p, hsa-miR-425, hsa-miR-489, hsa-miR-500, hsa-miR-502-3p, hsa-miR-532-3p, hsa-miR-532-5p, hsa-miR-652, hsa-miR-663, hsa-miR-668, hsa-miR-744 |
| <b>Contradicted miRNAs with previous studies</b>                                                                                                                                                                                                                                                                                                                                                                                                                                                                          |                                                                                                                                                                                                                                                                                                                                                                                                                                                                                                                                                                                                                                                                                                                                                                    |
| <b>Our study upregulated</b>                                                                                                                                                                                                                                                                                                                                                                                                                                                                                              | <b>Previously known as downregulated</b>                                                                                                                                                                                                                                                                                                                                                                                                                                                                                                                                                                                                                                                                                                                           |
| hsa-miR-29a                                                                                                                                                                                                                                                                                                                                                                                                                                                                                                               | hsa-miR-29a                                                                                                                                                                                                                                                                                                                                                                                                                                                                                                                                                                                                                                                                                                                                                        |
| <b>Our study downregulated</b>                                                                                                                                                                                                                                                                                                                                                                                                                                                                                            | <b>Previously known as upregulated</b>                                                                                                                                                                                                                                                                                                                                                                                                                                                                                                                                                                                                                                                                                                                             |
| hsa-miR-92b/hsa-miR-92b*, hsa-miR-324-3p, hsa-miR-765                                                                                                                                                                                                                                                                                                                                                                                                                                                                     | hsa-miR-92b/hsa-miR-92b*, hsa-miR-324-3p, hsa-miR-765                                                                                                                                                                                                                                                                                                                                                                                                                                                                                                                                                                                                                                                                                                              |

**Table S9:** Top ten differentially expressed miRNAs on the basis of target gene count and their functional enrichment.

| <b>Upregulates miRNA</b> |                                          |                     |                              |
|--------------------------|------------------------------------------|---------------------|------------------------------|
| <b>miRNA</b>             | <b>Enriched KEGG pathway</b>             | <b>Target genes</b> | <b>P-value of enrichment</b> |
| hsa-miR-10a*             | Steroid biosynthesis                     | 16                  | 0.000022                     |
|                          | Metabolic pathways                       |                     | 0.0078                       |
| hsa-miR-133a             | Basal cell carcinoma                     | 19                  | 0.0003                       |
|                          | Endocytosis                              |                     | 0.0035                       |
|                          | Pathways in cancer                       |                     | 0.0089                       |
| hsa-miR-23b*             | Terpenoid backbone biosynthesis          | 21                  | 4.51E-008                    |
|                          | Metabolic pathways                       |                     | 0.0000124                    |
|                          | Steroid biosynthesis                     |                     | 0.0000384                    |
|                          | Melanogenesis                            |                     | 0.0011                       |
| hsa-miR-302d             | Melanogenesis                            | 17                  | 0.0007                       |
|                          | Neuroactive ligand-receptor interaction  |                     | 0.0051                       |
| hsa-miR-31               | Terpenoid backbone biosynthesis          | 16                  | 0.0000135                    |
|                          | Steroid biosynthesis                     |                     | 0.000022                     |
|                          | Metabolic pathways                       |                     | 0.000042                     |
| hsa-miR-34b*             | Steroid biosynthesis                     | 17                  | 4.91E-008                    |
|                          | Metabolic pathways                       |                     | 0.00000308                   |
|                          | Biosynthesis of unsaturated fatty acids  |                     | 0.0000306                    |
|                          | Glycine, serine and threonine metabolism |                     | 0.000072                     |

|                            |                                         |    |             |
|----------------------------|-----------------------------------------|----|-------------|
|                            | Basal cell carcinoma                    |    | 0.0002      |
|                            | Pathways in cancer                      |    | 0.0072      |
| hsa-miR-34c-3p             | Terpenoid backbone biosynthesis         | 32 | 0.000000168 |
|                            | Steroid biosynthesis                    |    | 0.0000905   |
|                            | Biosynthesis of unsaturated fatty acids |    | 0.0001      |
|                            | Metabolic pathways                      |    | 0.0002      |
|                            | Basal cell carcinoma                    |    | 0.0008      |
| hsa-miR-495                | Neuroactive ligand-receptor interaction | 30 | 0.0000373   |
|                            | Pathways in cancer                      |    | 0.0000752   |
|                            | Focal adhesion                          |    | 0.0004      |
|                            | Endocytosis                             |    | 0.0086      |
| hsa-miR-539                | Terpenoid backbone biosynthesis         | 36 | 0.000000241 |
|                            | Steroid biosynthesis                    |    | 0.000000513 |
|                            | Metabolic pathways                      |    | 0.00000342  |
|                            | Biosynthesis of unsaturated fatty acids |    | 0.0001      |
|                            | Basal cell carcinoma                    |    | 0.001       |
|                            | Drug metabolism - cytochrome P450       |    | 0.0017      |
| hsa-miR-654-3p             | Neuroactive ligand-receptor interaction | 18 | 0.0057      |
|                            | Metabolic pathways                      |    | 0.0109      |
| <b>Downregulated miRNA</b> |                                         |    |             |
| hsa-miR-17*                | Protein digestion and absorption        | 18 | 0.0005      |

|              |                                                        |    |          |
|--------------|--------------------------------------------------------|----|----------|
|              | ECM-receptor interaction                               |    | 0.0006   |
|              | Amoebiasis                                             |    | 0.0009   |
|              | Focal adhesion                                         |    | 0.0031   |
| hsa-miR-210  | Hypertrophic cardiomyopathy (HCM)                      | 31 | 2.97e-05 |
|              | Focal adhesion                                         |    | 0.0004   |
|              | mTOR signaling pathway                                 |    | 0.0006   |
|              | p53 signaling pathway                                  |    | 0.0011   |
|              | Protein digestion and absorption                       |    | 0.0016   |
|              | Dilated cardiomyopathy                                 |    | 0.0019   |
|              | Salivary secretion                                     |    | 0.0019   |
|              | Leukocyte transendothelial migration                   |    | 0.0032   |
|              | Cell cycle                                             |    | 0.0036   |
| hsa-miR-30a  | Hypertrophic cardiomyopathy (HCM)                      | 53 | 0.0044   |
| hsa-miR-30d* | Hypertrophic cardiomyopathy (HCM)                      | 26 | 1.73e-05 |
|              | mTOR signaling pathway                                 |    | 0.0005   |
|              | Arrhythmogenic right ventricular cardiomyopathy (ARVC) |    | 0.0009   |
|              | Dilated cardiomyopathy                                 |    | 0.0014   |
|              | Cell adhesion molecules (CAMs)                         |    | 0.0029   |
|              | Focal adhesion                                         |    | 0.0065   |
| hsa-miR-30e  | Cytokine-cytokine receptor interaction                 | 37 | 0.0014   |
|              | Arrhythmogenic right ventricular cardiomyopathy (ARVC) |    | 0.0018   |
|              | Hypertrophic cardiomyopathy (HCM)                      |    | 0.0022   |
| hsa-miR-33b* | Focal adhesion                                         | 21 | 0.0001   |
|              | Protein digestion and absorption                       |    | 0.0006   |
|              | ECM-receptor interaction                               |    | 0.0007   |

|                |                                        |    |        |
|----------------|----------------------------------------|----|--------|
|                | Cell adhesion molecules (CAMs)         |    | 0.0017 |
|                | Cytokine-cytokine receptor interaction |    | 0.0066 |
| hsa-miR-345    | Hypertrophic cardiomyopathy (HCM)      | 27 | 0.0012 |
|                | Cell adhesion molecules (CAMs)         |    | 0.0029 |
| hsa-miR-532-5p | Leukocyte transendothelial migration   | 25 | 0.0019 |
|                | Chemokine signaling pathway            |    | 0.0049 |
|                | Cytokine-cytokine receptor interaction |    | 0.0095 |
| hsa-miR-627    | Mucin type O-Glycan biosynthesis       | 59 | 0.0007 |

**Table S10:** Description of various potential Feed-Forward loops and interaction in IPF-mediated regulatory networks

|                            | <b>Motif</b>    | <b>Number of potential FFLs</b> | <b>Genes</b> | <b>miRNAs</b> | <b>TFs</b> | <b>MiRNA-gene</b> | <b>MiRNA-TF</b> | <b>TF-gene</b> | <b>TF-miRNA</b> | <b>Gene-Gene</b> |
|----------------------------|-----------------|---------------------------------|--------------|---------------|------------|-------------------|-----------------|----------------|-----------------|------------------|
| <b>Set A genes network</b> | 3node TF-FFL    | 17                              | 5            | 7             | 8          | 13                | -               | 15             | 11              | -                |
|                            | 3node MiRNA-FFL | 246                             | 33           | 39            | 35         | 137               | 86              | 161            | -               | -                |
|                            | Total           | 263                             | 33           | 43            | 42         | 143               | 86              | 176            | 11              | -                |
| <b>Set A genes network</b> | 4node TF-FFL    | -                               | -            | -             | -          | -                 | -               | -              | -               | -                |
|                            | 4node MiRNA-FFL | 13                              | 14           | 5             | 5          | 16                | 5               | 16             | -               | 5                |
|                            | Total           | 13                              | 14           | 5             | 5          | 16                | 5               | 16             | -               | 5                |
| <b>Set B genes network</b> | 3node TF-FFL    | 65                              | 36           | 19            | 21         | 49                | -               | 63             | 32              | -                |
|                            | 3node MiRNA-FFL | 1250                            | 242          | 64            | 64         | 584               | 153             | 963            | -               | -                |
|                            | Total           | 1315                            | 243          | 73            | 77         | 607               | 153             | 1026           | 32              | -                |
| <b>Set B genes network</b> | 4node TF-FFL    | 1                               | 2            | 1             | 1          | 2                 | -               | 2              | 1               | 1                |
|                            | 4node MiRNA-FFL | 93                              | 43           | 20            | 19         | 77                | 32              | 112            | -               | 42               |
|                            | Total           | 94                              | 43           | 21            | 20         | 79                | 32              | 114            | 1               | 42               |

**Table S11:** Hub components of regulatory network in terms of IPF genes, IPF miRNAs and TFs

| <b>Set B Genes regulatory network</b> |                                |                                                |                  |                                |                 |                                |                                                                 |
|---------------------------------------|--------------------------------|------------------------------------------------|------------------|--------------------------------|-----------------|--------------------------------|-----------------------------------------------------------------|
| <b>IPF Genes</b>                      | <b>Indegree/<br/>Outdegree</b> | <b>Function</b>                                | <b>IPF miRNA</b> | <b>Indegree/<br/>Outdegree</b> | <b>TFs</b>      | <b>Indegree/<br/>Outdegree</b> | <b>Function</b>                                                 |
| PDE4D                                 | 105/1                          | Alveolar Epithelial Cell (AEC) proliferation   | miR-627          | 1/61                           | XBP1            | 4/458                          | Regulate cell proliferation and angiogenesis                    |
| NEDD9                                 | 95/0                           | Cell adhesion                                  | miR-30a          | 6/58                           | RARB            | 1/386                          | Regulate cell growth and differentiation                        |
| FLT1                                  | 94/6                           | Angiogenesis and vasculogenesis                | miR-30e          | 0/45                           | CEBPB           | 1/368                          | Control of genes involved in immune responses                   |
| RASGEF1B                              | 93/0                           | Ras guanyl-nucleotide exchange factor activity | miR-539          | 2/36                           | AR              | 3/363                          | Androgen receptor responsible for regulating gene transcription |
| TMEM2                                 | 88/0                           | Transmembrane protein                          | miR-495          | 0/34                           | FOXA1           | 0/363                          | Regulation of metabolism and differentiation                    |
| <b>Set A Genes regulatory network</b> |                                |                                                |                  |                                |                 |                                |                                                                 |
| FZD5                                  | 76/0                           | Receptor of Wnt signaling proteins             | miR-30e          | 0/19                           | TCF4/T<br>CF7L2 | 5/27                           | Key regulator of Wnt signaling                                  |
| KCNMA1                                | 76/0                           | Repolarization of membrane potential           | miR-30a          | 6/17                           | VDR             | 0/26                           | Regulation of cell proliferation and calcium homeostasis        |
| SYTL2                                 | 71/0                           | Vesicle trafficking                            | miR-30d*         | 0/16                           | ETS1            | 2/25                           | Regulation of genes belonged to development and apoptosis       |
| SLC39A8                               | 62/0                           | Transporter of Zn and toxic cadmium ion        | miR-345          | 0/14                           | STAT1           | 0/25                           | Stimulation of interferons                                      |
| DCLK1                                 | 60/0                           | Neurogenesis, neuronal migration and apoptosis | miR-539          | 2/13                           | XBP1            | 4/24                           | Regulate cell proliferation and angiogenesis                    |

**Table S12:** Detailed information of high-throughput data considered for study from different Data sources

| Study ID                                                           | Sample Id | Final<br>Diagnosis | Sample Name                            | Tissue<br>Type | Tissue<br>Subtype |
|--------------------------------------------------------------------|-----------|--------------------|----------------------------------------|----------------|-------------------|
| <b>GSE21411 (11 IPF, 6 Control) Gene Microarray Cho et al.</b>     |           |                    |                                        |                |                   |
| GSE21411                                                           | GSM533882 | control            | Control_1                              | lung           | lung              |
| GSE21411                                                           | GSM533883 | control            | Control_2                              | lung           | lung              |
| GSE21411                                                           | GSM533884 | control            | Control_3                              | lung           | lung              |
| GSE21411                                                           | GSM533885 | control            | Control_4                              | lung           | lung              |
| GSE21411                                                           | GSM533886 | control            | Control_5                              | lung           | lung              |
| GSE21411                                                           | GSM533887 | control            | Control_6                              | lung           | lung              |
| GSE21411                                                           | GSM533888 | UIP/IPF            | ILD_1                                  | lung           | lung              |
| GSE21411                                                           | GSM533889 | UIP/IPF            | ILD_2                                  | lung           | lung              |
| GSE21411                                                           | GSM533891 | UIP/IPF            | ILD_4                                  | lung           | lung              |
| GSE21411                                                           | GSM533892 | UIP/IPF            | ILD_5                                  | lung           | lung              |
| GSE21411                                                           | GSM533893 | UIP/IPF            | ILD_6                                  | lung           | lung              |
| GSE21411                                                           | GSM533896 | UIP/IPF            | ILD_9                                  | lung           | lung              |
| GSE21411                                                           | GSM533897 | UIP/IPF            | ILD_10                                 | lung           | lung              |
| GSE21411                                                           | GSM533899 | UIP/IPF            | ILD_12                                 | lung           | lung              |
| GSE21411                                                           | GSM533905 | UIP/IPF            | ILD_18                                 | lung           | lung              |
| GSE21411                                                           | GSM533909 | UIP/IPF            | ILD_22                                 | lung           | lung              |
| GSE21411                                                           | GSM533910 | UIP/IPF            | ILD_23                                 | lung           | lung              |
| <b>GSE24206 (17 IPF, 6 Control) Gene Microarray Meltzer et al.</b> |           |                    |                                        |                |                   |
| GSE24206                                                           | GSM595407 | control            | Healthy donor_biological<br>replicate1 | lung           | lung              |
| GSE24206                                                           | GSM595411 | control            | Healthy donor_biological<br>replicate2 | lung           | lung              |
| GSE24206                                                           | GSM595414 | control            | Healthy donor_biological<br>replicate3 | lung           | lung              |
| GSE24206                                                           | GSM595416 | control            | Healthy donor_biological<br>replicate4 | lung           | lung              |



|          |           |         |                                                |      |                        |
|----------|-----------|---------|------------------------------------------------|------|------------------------|
| GSE24206 | GSM595417 | control | Healthy donor_biological<br>replicate5         | lung | lung                   |
| GSE24206 | GSM595419 | control | Healthy donor_biological<br>replicate6         | lung | lung                   |
| GSE24206 | GSM595421 | IPF     | Early IPF_surgical<br>biopsy_upper lobe_rep140 | lung | lung,<br>upper<br>lobe |
| GSE24206 | GSM595422 | IPF     | Early IPF_surgical<br>biopsy_upper lobe_rep142 | lung | lung,<br>upper<br>lobe |
| GSE24206 | GSM595423 | IPF     | Early IPF_surgical<br>biopsy_upper lobe_rep144 | lung | lung,<br>upper<br>lobe |
| GSE24206 | GSM595424 | IPF     | Early IPF_surgical<br>biopsy_upper lobe_rep145 | lung | lung,<br>upper<br>lobe |
| GSE24206 | GSM595425 | IPF     | Advanced<br>IPF_explant_lower<br>lobe_rep146   | lung | lung,<br>lower<br>lobe |
| GSE24206 | GSM595426 | IPF     | Early IPF_surgical<br>biopsy_upper lobe_rep149 | lung | lung,<br>upper<br>lobe |
| GSE24206 | GSM595427 | IPF     | Early IPF_surgical<br>biopsy_lower lobe_rep149 | lung | lung,<br>lower<br>lobe |
| GSE24206 | GSM595428 | IPF     | Advanced<br>IPF_explant_upper                  | lung | lung,<br>upper         |

|          |           |     |                                                |      |                        |
|----------|-----------|-----|------------------------------------------------|------|------------------------|
|          |           |     | lobe_rep152                                    |      | lobe                   |
| GSE24206 | GSM595429 | IPF | Advanced<br>IPF_explant_lower<br>lobe_rep152   | lung | lung,<br>lower<br>lobe |
| GSE24206 | GSM595432 | IPF | Advanced<br>IPF_explant_upper<br>lobe_rep157   | lung | lung,<br>upper<br>lobe |
| GSE24206 | GSM595434 | IPF | Advanced<br>IPF_explant_lower<br>lobe_rep157   | lung | lung,<br>lower<br>lobe |
| GSE24206 | GSM595435 | IPF | Advanced<br>IPF_explant_upper<br>lobe_rep158   | lung | lung,<br>upper<br>lobe |
| GSE24206 | GSM595437 | IPF | Advanced<br>IPF_explant_lower<br>lobe_rep158   | lung | lung,<br>lower<br>lobe |
| GSE24206 | GSM595439 | IPF | Early IPF_surgical<br>biopsy_upper lobe_rep159 | lung | lung,<br>upper<br>lobe |
| GSE24206 | GSM595441 | IPF | Early IPF_surgical<br>biopsy_lower lobe_rep159 | lung | lung,<br>lower<br>lobe |
| GSE24206 | GSM595443 | IPF | Advanced<br>IPF_explant_upper<br>lobe_rep160   | lung | lung,<br>upper<br>lobe |
| GSE24206 | GSM595445 | IPF | Advanced<br>IPF_explant_lower                  | lung | lung,<br>lower         |

|                                                                   |           |         | lobe_rep160 |      | lobe     |
|-------------------------------------------------------------------|-----------|---------|-------------|------|----------|
| <b>GSE32537 (119 IPF, 50 Control) Gene Microarray Yang et al.</b> |           |         |             |      |          |
| GSE32537                                                          | GSM806204 | IPF/UIP | LT000216    | lung | L Lower  |
| GSE32537                                                          | GSM806205 | IPF/UIP | LT001600    | lung | R Lower  |
| GSE32537                                                          | GSM806207 | IPF/UIP | LT002902    | lung | R Lower  |
| GSE32537                                                          | GSM806208 | IPF/UIP | LT004173    | lung | L Lower  |
| GSE32537                                                          | GSM806209 | IPF/UIP | LT006783    | lung | R Lower  |
| GSE32537                                                          | GSM806210 | IPF/UIP | LT006946    | lung | R Lower  |
| GSE32537                                                          | GSM806212 | IPF/UIP | LT008069    | lung | R Lower  |
| GSE32537                                                          | GSM806214 | IPF/UIP | LT009429    | lung | R Lower  |
| GSE32537                                                          | GSM806216 | IPF/UIP | LT012417    | lung | R Lower  |
| GSE32537                                                          | GSM806219 | IPF/UIP | LT019699    | lung | R Lower  |
| GSE32537                                                          | GSM806220 | IPF/UIP | LT020259    | lung | L Lower  |
| GSE32537                                                          | GSM806221 | IPF/UIP | LT025724    | lung | L Lower  |
| GSE32537                                                          | GSM806222 | IPF/UIP | LT026534    | lung | R Lower  |
| GSE32537                                                          | GSM806223 | IPF/UIP | LT030385    | lung | R Lower  |
| GSE32537                                                          | GSM806225 | IPF/UIP | LT033422    | lung | R Lower  |
| GSE32537                                                          | GSM806226 | IPF/UIP | LT039091    | lung | R Lower  |
| GSE32537                                                          | GSM806227 | IPF/UIP | LT041723    | lung | R Lower  |
| GSE32537                                                          | GSM806228 | IPF/UIP | LT046539    | lung | R Lower  |
| GSE32537                                                          | GSM806229 | IPF/UIP | LT047521    | lung | R Lower  |
| GSE32537                                                          | GSM806230 | IPF/UIP | LT049193    | lung | L Upper  |
| GSE32537                                                          | GSM806231 | IPF/UIP | LT056301    | lung | L Upper  |
| GSE32537                                                          | GSM806232 | IPF/UIP | LT056464    | lung | R Lower  |
| GSE32537                                                          | GSM806234 | IPF/UIP | LT059846    | lung | R Lower  |
| GSE32537                                                          | GSM806235 | IPF/UIP | LT062141    | lung | R Lower  |
| GSE32537                                                          | GSM806236 | IPF/UIP | LT062911    | lung | L Upper  |
| GSE32537                                                          | GSM806237 | IPF/UIP | LT063974    | lung | L Lower  |
| GSE32537                                                          | GSM806238 | IPF/UIP | LT067200    | lung | L Upper  |
| GSE32537                                                          | GSM806239 | IPF/UIP | LT067836    | lung | R Lower  |
| GSE32537                                                          | GSM806240 | IPF/UIP | LT069422    | lung | R Lower  |
| GSE32537                                                          | GSM806241 | IPF/UIP | LT071706    | lung | R Middle |
| GSE32537                                                          | GSM806242 | IPF/UIP | LT072789    | lung | R Upper  |
| GSE32537                                                          | GSM806243 | IPF/UIP | LT074868    | lung | R Lower  |

|          |           |         |          |      |          |
|----------|-----------|---------|----------|------|----------|
| GSE32537 | GSM806247 | IPF/UIP | LT080836 | lung | R Middle |
| GSE32537 | GSM806250 | IPF/UIP | LT087826 | lung | L Upper  |
| GSE32537 | GSM806251 | IPF/UIP | LT089958 | lung | R Lower  |
| GSE32537 | GSM806252 | IPF/UIP | LT090283 | lung | L Lower  |
| GSE32537 | GSM806253 | IPF/UIP | LT091552 | lung | L Lower  |
| GSE32537 | GSM806254 | IPF/UIP | LT092669 | lung | L Lower  |
| GSE32537 | GSM806255 | IPF/UIP | LT093665 | lung | L Ling   |
| GSE32537 | GSM806257 | IPF/UIP | LT095103 | lung | L Lower  |
| GSE32537 | GSM806258 | IPF/UIP | LT098394 | lung | R Lower  |
| GSE32537 | GSM806259 | IPF/UIP | LT099826 | lung | L Lower  |
| GSE32537 | GSM806260 | IPF/UIP | LT100434 | lung | L Upper  |
| GSE32537 | GSM806261 | IPF/UIP | LT101536 | lung | L Lower  |
| GSE32537 | GSM806262 | IPF/UIP | LT102695 | lung | L Lower  |
| GSE32537 | GSM806263 | IPF/UIP | LT103266 | lung | R Lower  |
| GSE32537 | GSM806264 | IPF/UIP | LT104717 | lung | R Lower  |
| GSE32537 | GSM806267 | IPF/UIP | LT109321 | lung | R Lower  |
| GSE32537 | GSM806268 | IPF/UIP | LT112491 | lung | R Middle |
| GSE32537 | GSM806269 | IPF/UIP | LT116459 | lung | L Lower  |
| GSE32537 | GSM806273 | IPF/UIP | LT119242 | lung | R Lower  |
| GSE32537 | GSM806274 | IPF/UIP | LT128191 | lung | L Lower  |
| GSE32537 | GSM806275 | IPF/UIP | LT128262 | lung | R Upper  |
| GSE32537 | GSM806276 | IPF/UIP | LT130861 | lung | R Lower  |
| GSE32537 | GSM806277 | IPF/UIP | LT134279 | lung | L Lower  |
| GSE32537 | GSM806278 | IPF/UIP | LT134302 | lung | L Lower  |
| GSE32537 | GSM806279 | IPF/UIP | LT134776 | lung | L Lower  |
| GSE32537 | GSM806281 | IPF/UIP | LT137431 | lung | R Lower  |
| GSE32537 | GSM806284 | IPF/UIP | LT142933 | lung | R Upper  |
| GSE32537 | GSM806285 | IPF/UIP | LT144921 | lung | L Lower  |
| GSE32537 | GSM806286 | IPF/UIP | LT148511 | lung | L Upper  |
| GSE32537 | GSM806287 | IPF/UIP | LT150445 | lung | R Lower  |
| GSE32537 | GSM806290 | IPF/UIP | LT154952 | lung | R Lower  |
| GSE32537 | GSM806291 | IPF/UIP | LT156276 | lung | R Lower  |
| GSE32537 | GSM806292 | IPF/UIP | LT157253 | lung | R Lower  |
| GSE32537 | GSM806293 | IPF/UIP | LT157856 | lung | L Upper  |

|          |           |         |          |      |          |
|----------|-----------|---------|----------|------|----------|
| GSE32537 | GSM806294 | IPF/UIP | LT159457 | lung | L Lower  |
| GSE32537 | GSM806297 | IPF/UIP | LT163953 | lung | R Lower  |
| GSE32537 | GSM806298 | IPF/UIP | LT165736 | lung | L Lower  |
| GSE32537 | GSM806299 | IPF/UIP | LT166493 | lung | R Lower  |
| GSE32537 | GSM806300 | IPF/UIP | LT167906 | lung | L Lower  |
| GSE32537 | GSM806301 | IPF/UIP | LT168219 | lung | R Lower  |
| GSE32537 | GSM806302 | IPF/UIP | LT168352 | lung | L Lower  |
| GSE32537 | GSM806305 | IPF/UIP | LT173946 | lung | R Lower  |
| GSE32537 | GSM806306 | IPF/UIP | LT174813 | lung | L Lower  |
| GSE32537 | GSM806307 | IPF/UIP | LT175399 | lung | R Upper  |
| GSE32537 | GSM806308 | IPF/UIP | LT180758 | lung | R Middle |
| GSE32537 | GSM806309 | IPF/UIP | LT182067 | lung | R Lower  |
| GSE32537 | GSM806310 | IPF/UIP | LT182636 | lung | R Lower  |
| GSE32537 | GSM806313 | IPF/UIP | LT185396 | lung | R Lower  |
| GSE32537 | GSM806314 | IPF/UIP | LT187987 | lung | L Lower  |
| GSE32537 | GSM806315 | IPF/UIP | LT188467 | lung | L Lower  |
| GSE32537 | GSM806316 | IPF/UIP | LT188524 | lung | R Lower  |
| GSE32537 | GSM806318 | IPF/UIP | LT194091 | lung | R Lower  |
| GSE32537 | GSM806320 | IPF/UIP | LT195192 | lung | R Lower  |
| GSE32537 | GSM806321 | IPF/UIP | LT196309 | lung | R Lower  |
| GSE32537 | GSM806322 | IPF/UIP | LT197286 | lung | L Upper  |
| GSE32537 | GSM806324 | IPF/UIP | LT201348 | lung | L Upper  |
| GSE32537 | GSM806327 | IPF/UIP | LT205601 | lung | R Lower  |
| GSE32537 | GSM806329 | IPF/UIP | LT206005 | lung | R Lower  |
| GSE32537 | GSM806330 | IPF/UIP | LT207236 | lung | R Middle |
| GSE32537 | GSM806332 | IPF/UIP | LT211379 | lung | R Lower  |
| GSE32537 | GSM806333 | IPF/UIP | LT211455 | lung | L Upper  |
| GSE32537 | GSM806335 | IPF/UIP | LT217339 | lung | R Middle |
| GSE32537 | GSM806336 | IPF/UIP | LT219681 | lung | R Lower  |
| GSE32537 | GSM806338 | IPF/UIP | LT221381 | lung | R Lower  |
| GSE32537 | GSM806339 | IPF/UIP | LT228897 | lung | L Lower  |
| GSE32537 | GSM806340 | IPF/UIP | LT230142 | lung | R Lower  |
| GSE32537 | GSM806342 | IPF/UIP | LT231373 | lung | L Upper  |
| GSE32537 | GSM806344 | IPF/UIP | LT235441 | lung | R Lower  |

|          |           |         |          |      |                     |
|----------|-----------|---------|----------|------|---------------------|
| GSE32537 | GSM806346 | IPF/UIP | LT242161 | lung | R Lower             |
| GSE32537 | GSM806349 | IPF/UIP | LT258372 | lung | R Lower             |
| GSE32537 | GSM806351 | IPF/UIP | LT262773 | lung | L Upper             |
| GSE32537 | GSM806352 | IPF/UIP | LT263234 | lung | R Lower             |
| GSE32537 | GSM806354 | IPF/UIP | LT264690 | lung | L Upper             |
| GSE32537 | GSM806355 | IPF/UIP | LT266377 | lung | R Lower             |
| GSE32537 | GSM806356 | IPF/UIP | LT266817 | lung | L Lower             |
| GSE32537 | GSM806357 | IPF/UIP | LT269381 | lung | R Upper             |
| GSE32537 | GSM806358 | IPF/UIP | LT269763 | lung | R Lower             |
| GSE32537 | GSM806359 | IPF/UIP | LT275526 | lung | R Middle            |
| GSE32537 | GSM806361 | IPF/UIP | LT275751 | lung | R Lower             |
| GSE32537 | GSM806362 | IPF/UIP | LT277811 | lung | R Lower             |
| GSE32537 | GSM806363 | IPF/UIP | LT280851 | lung | L Lower             |
| GSE32537 | GSM806364 | IPF/UIP | LT282601 | lung | L Upper             |
| GSE32537 | GSM806365 | IPF/UIP | LT284326 | lung | R Lower             |
| GSE32537 | GSM806366 | IPF/UIP | LT284489 | lung | L Lower             |
| GSE32537 | GSM806368 | IPF/UIP | LT287196 | lung | L Lower             |
| GSE32537 | GSM806369 | IPF/UIP | LT287909 | lung | L Ling              |
| GSE32537 | GSM806370 | IPF/UIP | LT295133 | lung | L Lower             |
| GSE32537 | GSM806371 | control | NJ004803 | lung | Aliquot<br>85/RLL-P |
| GSE32537 | GSM806372 | control | NJ004804 | lung | Aliquot<br>70/LLL-P |
| GSE32537 | GSM806373 | control | NJ004808 | lung | Aliquot<br>91/RLL-P |
| GSE32537 | GSM806374 | control | NJ004818 | lung | Aliquot<br>73/RLL-P |
| GSE32537 | GSM806375 | control | NJ004819 | lung | Aliquot<br>65/LLL-P |
| GSE32537 | GSM806376 | control | NJ004824 | lung | Aliquot<br>48/LLL-P |
| GSE32537 | GSM806377 | control | NJ004827 | lung | Aliquot             |

|          |           |         |          |      |                      |
|----------|-----------|---------|----------|------|----------------------|
|          |           |         |          |      | 92/RLL-P             |
| GSE32537 | GSM806378 | control | NJ004830 | lung | Aliquot<br>47/RLL-P  |
| GSE32537 | GSM806379 | control | NJ004840 | lung | Aliquote<br>66/RLL-P |
| GSE32537 | GSM806380 | control | NJ004847 | lung | Aliquot<br>41/LLL-P  |
| GSE32537 | GSM806381 | control | NJ004851 | lung | Aliquot<br>1/LLL-C   |
| GSE32537 | GSM806382 | control | NJ004860 | lung | Aliquot<br>1/RLL-P   |
| GSE32537 | GSM806383 | control | NJ004863 | lung | Aliquot<br>52/RLL-P  |
| GSE32537 | GSM806384 | control | NJ020000 | lung | Aliquot<br>6/LLL-P   |
| GSE32537 | GSM806385 | control | NJ020001 | lung | R Lower              |
| GSE32537 | GSM806386 | control | NJ020002 | lung | Aliquot<br>1/RLL-P   |
| GSE32537 | GSM806387 | control | NJ020003 | lung | Aliquot<br>1/RLL-P   |
| GSE32537 | GSM806388 | control | NJ020005 | lung | Aliquot<br>1/RLL-P   |
| GSE32537 | GSM806389 | control | NJ020006 | lung | Aliquot<br>1/RLL-P   |
| GSE32537 | GSM806390 | control | NJ020007 | lung | Aliquot<br>1/RLL-P   |
| GSE32537 | GSM806391 | control | NJ020011 | lung | Aliquot<br>1/RLL-P   |
| GSE32537 | GSM806392 | control | NJ020015 | lung | Aliquot              |

|          |           |         |          |      |                     |
|----------|-----------|---------|----------|------|---------------------|
|          |           |         |          |      | 7/LLL-P             |
| GSE32537 | GSM806393 | control | NJ020016 | lung | Aliquot<br>1/RLL-P  |
| GSE32537 | GSM806394 | control | NJ020017 | lung | Aliquot<br>1/RLL-P  |
| GSE32537 | GSM806395 | control | NJ020022 | lung | Aliquot<br>37/LLL   |
| GSE32537 | GSM806396 | control | NJ020025 | lung | Aliquot<br>1/LLL-P  |
| GSE32537 | GSM806397 | control | NJ020026 | lung | Aliquot<br>1/LLL-P  |
| GSE32537 | GSM806398 | control | NJ020027 | lung | Aliquot<br>67/RLL   |
| GSE32537 | GSM806399 | control | NJ020028 | lung | Aliquot<br>37/RLL-P |
| GSE32537 | GSM806400 | control | NJ020032 | lung | Aliquot<br>62/RLL-P |
| GSE32537 | GSM806401 | control | NJ020036 | lung | Aliquot<br>70/LLL-P |
| GSE32537 | GSM806402 | control | NJ020040 | lung | Aliquot<br>7/RLL-C  |
| GSE32537 | GSM806403 | control | NJ020042 | lung | Aliquot<br>2/RLL-P  |
| GSE32537 | GSM806404 | control | NJ020044 | lung | Aliquot<br>2/RLL-P  |
| GSE32537 | GSM806405 | control | NJ020045 | lung | Aliquot<br>3/RLL-P  |
| GSE32537 | GSM806406 | control | NJ020049 | lung | Aliquot             |



|          |           |         |          |      |                         |
|----------|-----------|---------|----------|------|-------------------------|
|          |           |         |          |      | 1/RLL-P                 |
| GSE32537 | GSM806407 | control | NJ020051 | lung | Aliquot<br>74/RLL       |
| GSE32537 | GSM806408 | control | NJ020053 | lung | Aliquot<br>1/RLL-P      |
| GSE32537 | GSM806409 | control | NJ020055 | lung | R Lower                 |
| GSE32537 | GSM806410 | control | NJ020056 | lung | Aliquot<br>1/RLL-P      |
| GSE32537 | GSM806411 | control | NJ020061 | lung | Aliquot<br>1/RLL-P      |
| GSE32537 | GSM806412 | control | NJ020063 | lung | Aliquot<br>1/RLL-P      |
| GSE32537 | GSM806413 | control | NJ020064 | lung | Aliquot<br>30/RLL       |
| GSE32537 | GSM806414 | control | NJ020066 | lung | Aliquot<br>30/RLL       |
| GSE32537 | GSM806415 | control | NJ020077 | lung | Aliquot<br>1/RLL-P      |
| GSE32537 | GSM806416 | control | NJ020079 | lung | Aliquot<br>1/RLL-C      |
| GSE32537 | GSM806417 | control | NJ020080 | lung | Aliquot<br>14/RML-<br>P |
| GSE32537 | GSM806418 | control | NJ020081 | lung | Aliquot<br>24/RML       |
| GSE32537 | GSM806419 | control | NJ020083 | lung | Aliquot<br>10/RML-<br>C |

|                                                                   |            |         |              |      |           |
|-------------------------------------------------------------------|------------|---------|--------------|------|-----------|
| GSE32537                                                          | GSM806420  | control | NJ020343     | lung | Aliquot 1 |
| <b>GSE35147 (4 IPF, 4 Control) Gene Microarray Sanders et al.</b> |            |         |              |      |           |
| GSE35147                                                          | GSM862605  | IPF     | RNA_IPF_2    | lung | lung      |
| GSE35147                                                          | GSM862606  | IPF     | RNA_IPF_3    | lung | lung      |
| GSE35147                                                          | GSM862607  | IPF     | RNA_IPF_C    | lung | lung      |
| GSE35147                                                          | GSM862608  | IPF     | RNA_IPF_S    | lung | lung      |
| GSE35147                                                          | GSM862609  | control | RNA_Normal_M | lung | lung      |
| GSE35147                                                          | GSM862610  | control | RNA_Normal_N | lung | lung      |
| GSE35147                                                          | GSM862611  | control | RNA_Normal_O | lung | lung      |
| GSE35147                                                          | GSM862612  | control | RNA_Normal_W | lung | lung      |
| <b>GSE10921 (4 IPF, 3 Control) Gene Microarray Vuga et al.</b>    |            |         |              |      |           |
| GSE10921                                                          | GSM276848  | Control | NL-5         | Lung | Lung      |
| GSE10921                                                          | GSM276849  | Control | NL-6         | Lung | Lung      |
| GSE10921                                                          | GSM276850  | Control | NL-7         | Lung | Lung      |
| GSE10921                                                          | GSM276852  | IPF/UIP | IPF-19       | Lung | Lung      |
| GSE10921                                                          | GSM276853  | IPF/UIP | IPF-20       | Lung | Lung      |
| GSE10921                                                          | GSM276854  | IPF/UIP | IPF-21       | Lung | Lung      |
| GSE10921                                                          | GSM276855  | IPF/UIP | IPF-22       | Lung | Lung      |
| <b>GSE31934 (3 IPF, 3 Control) Gene Microarray Yue et al.</b>     |            |         |              |      |           |
| GSE31934                                                          | GSM791344  | IPF     | IPF3         | Lung | Lung      |
| GSE31934                                                          | GSM791345  | IPF     | IPF2         | Lung | Lung      |
| GSE31934                                                          | GSM791346  | IPF     | IPF1         | Lung | Lung      |
| GSE31934                                                          | GSM791347  | Control | CON3         | Lung | Lung      |
| GSE31934                                                          | GSM791348  | Control | CON2         | Lung | Lung      |
| GSE31934                                                          | GSM791349  | Control | CON1         | Lung | Lung      |
| <b>SRP033095 (8 IPF, 7 Control) RNA-Seq Nance et al.</b>          |            |         |              |      |           |
| GSE52463                                                          | GSM1267256 | control | Norm1        | lung | lung      |
| GSE52463                                                          | GSM1267257 | control | Norm2        | lung | lung      |
| GSE52463                                                          | GSM1267258 | control | Norm3        | lung | lung      |
| GSE52463                                                          | GSM1267259 | control | Norm4        | lung | lung      |
| GSE52463                                                          | GSM1267260 | control | Norm5        | lung | lung      |
| GSE52463                                                          | GSM1267261 | control | Norm6        | lung | lung      |
| GSE52463                                                          | GSM1267262 | control | Norm8        | lung | lung      |
| GSE52463                                                          | GSM1267263 | IPF     | IPF1         | lung | lung      |

|                                                                        |            |         |                           |               |               |
|------------------------------------------------------------------------|------------|---------|---------------------------|---------------|---------------|
| GSE52463                                                               | GSM1267264 | IPF     | IPF2                      | lung          | lung          |
| GSE52463                                                               | GSM1267265 | IPF     | IPF3                      | lung          | lung          |
| GSE52463                                                               | GSM1267266 | IPF     | IPF4                      | lung          | lung          |
| GSE52463                                                               | GSM1267267 | IPF     | IPF5                      | lung          | lung          |
| GSE52463                                                               | GSM1267268 | IPF     | IPF6                      | lung          | lung          |
| GSE52463                                                               | GSM1267269 | IPF     | IPF7                      | lung          | lung          |
| GSE52463                                                               | GSM1267270 | IPF     | IPF8                      | lung          | lung          |
| <b>SRP010041 (3 IPF, 3 Control) RNA-Seq Deng et al.</b>                |            |         |                           |               |               |
| SRP010041                                                              | SRR393010  | Control | Control1                  | lung          | lung          |
| SRP010041                                                              | SRR393011  | Control | Control2                  | lung          | lung          |
| SRP010041                                                              | SRR393012  | Control | Control3                  | lung          | lung          |
| SRP010041                                                              | SRR393013  | IPF     | IPF1                      | lung          | lung          |
| SRP010041                                                              | SRR393014  | IPF     | IPF2                      | lung          | lung          |
| SRP010041                                                              | SRR393015  | IPF     | IPF3                      | lung          | lung          |
| <b>GSE27430 (13 IPF, 12 Control) miRNA Microarray Milosevic et al.</b> |            |         |                           |               |               |
| GSE27430                                                               | GSM678128  | UIP/IPF | UIP/IPF, biological rep 1 | whole<br>lung | whole<br>lung |
| GSE27430                                                               | GSM678129  | UIP/IPF | UIP/IPF, biological rep 2 | whole<br>lung | whole<br>lung |
| GSE27430                                                               | GSM678130  | UIP/IPF | UIP/IPF, biological rep 3 | whole<br>lung | whole<br>lung |
| GSE27430                                                               | GSM678131  | UIP/IPF | UIP/IPF, biological rep 4 | whole<br>lung | whole<br>lung |
| GSE27430                                                               | GSM678132  | UIP/IPF | UIP/IPF, biological rep 5 | whole<br>lung | whole<br>lung |
| GSE27430                                                               | GSM678133  | UIP/IPF | UIP/IPF, biological rep 6 | whole<br>lung | whole<br>lung |
| GSE27430                                                               | GSM678134  | UIP/IPF | UIP/IPF, biological rep 7 | whole<br>lung | whole<br>lung |
| GSE27430                                                               | GSM678135  | UIP/IPF | UIP/IPF, biological rep 8 | whole<br>lung | whole<br>lung |

|          |           |         |                            |               |               |
|----------|-----------|---------|----------------------------|---------------|---------------|
| GSE27430 | GSM678136 | UIP/IPF | UIP/IPF, biological rep 9  | whole<br>lung | whole<br>lung |
| GSE27430 | GSM678137 | UIP/IPF | UIP/IPF, biological rep 10 | whole<br>lung | whole<br>lung |
| GSE27430 | GSM678138 | UIP/IPF | UIP/IPF, biological rep 11 | whole<br>lung | whole<br>lung |
| GSE27430 | GSM678139 | UIP/IPF | UIP/IPF, biological rep 12 | whole<br>lung | whole<br>lung |
| GSE27430 | GSM678140 | UIP/IPF | UIP/IPF, biological rep 13 | whole<br>lung | whole<br>lung |
| GSE27430 | GSM678141 | control | control, biological rep 1  | whole<br>lung | whole<br>lung |
| GSE27430 | GSM678142 | control | control, biological rep 2  | whole<br>lung | whole<br>lung |
| GSE27430 | GSM678143 | control | control, biological rep 3  | whole<br>lung | whole<br>lung |
| GSE27430 | GSM678144 | control | control, biological rep 4  | whole<br>lung | whole<br>lung |
| GSE27430 | GSM678145 | control | control, biological rep 5  | whole<br>lung | whole<br>lung |
| GSE27430 | GSM678146 | control | control, biological rep 6  | whole<br>lung | whole<br>lung |
| GSE27430 | GSM678147 | control | control, biological rep 7  | whole<br>lung | whole<br>lung |
| GSE27430 | GSM678148 | control | control, biological rep 8  | whole<br>lung | whole<br>lung |
| GSE27430 | GSM678149 | control | control, biological rep 9  | whole<br>lung | whole<br>lung |

|                                                                    |           |         |                            |               |                     |
|--------------------------------------------------------------------|-----------|---------|----------------------------|---------------|---------------------|
| GSE27430                                                           | GSM678150 | control | control, biological rep 10 | whole<br>lung | whole<br>lung       |
| GSE27430                                                           | GSM678151 | control | control, biological rep 11 | whole<br>lung | whole<br>lung       |
| GSE27430                                                           | GSM678152 | control | control, biological rep 12 | whole<br>lung | whole<br>lung       |
| <b>GSE21394 (9 IPF, 6 Control) miRNA Microarray Cho et al.</b>     |           |         |                            |               |                     |
| GSE21394                                                           | GSM534522 | UIP/IPF | ILD_1                      | lung          | lung                |
| GSE21394                                                           | GSM534523 | UIP/IPF | ILD_2                      | lung          | lung                |
| GSE21394                                                           | GSM534525 | UIP/IPF | ILD_5                      | lung          | lung                |
| GSE21394                                                           | GSM534526 | UIP/IPF | ILD_6                      | lung          | lung                |
| GSE21394                                                           | GSM534528 | UIP/IPF | ILD_9                      | lung          | lung                |
| GSE21394                                                           | GSM534529 | UIP/IPF | ILD_10                     | lung          | lung                |
| GSE21394                                                           | GSM534531 | UIP/IPF | ILD_12                     | lung          | lung                |
| GSE21394                                                           | GSM534539 | UIP/IPF | ILD_22                     | lung          | lung                |
| GSE21394                                                           | GSM534540 | UIP/IPF | ILD_23                     | lung          | lung                |
| GSE21394                                                           | GSM534516 | Normal  | Control_1                  | lung          | lung                |
| GSE21394                                                           | GSM534517 | Normal  | Control_2                  | lung          | lung                |
| GSE21394                                                           | GSM534518 | Normal  | Control_3                  | lung          | lung                |
| GSE21394                                                           | GSM534519 | Normal  | Control_4                  | lung          | lung                |
| GSE21394                                                           | GSM534520 | Normal  | Control_5                  | lung          | lung                |
| GSE21394                                                           | GSM534521 | Normal  | Control_6                  | lung          | lung                |
| <b>GSE32538 (106 IPF, 50 Control) miRNA Microarray Yang et al.</b> |           |         |                            |               |                     |
| GSE32538                                                           | GSM806563 | Control | NJ004803                   | Lung          | Aliquot<br>85/RLL-P |
| GSE32538                                                           | GSM806564 | Control | NJ004804                   | Lung          | Aliquot<br>70/LLL-P |
| GSE32538                                                           | GSM806565 | Control | NJ004808                   | Lung          | Aliquot<br>91/RLL-P |
| GSE32538                                                           | GSM806566 | Control | NJ004818                   | Lung          | Aliquot<br>73/RLL-P |

|          |           |         |          |      |                      |
|----------|-----------|---------|----------|------|----------------------|
| GSE32538 | GSM806567 | Control | NJ004819 | Lung | Aliquot<br>65/LLL-P  |
| GSE32538 | GSM806568 | Control | NJ004824 | Lung | Aliquot<br>48/LLL-P  |
| GSE32538 | GSM806569 | Control | NJ004827 | Lung | Aliquot<br>92/RLL-P  |
| GSE32538 | GSM806570 | Control | NJ004830 | Lung | Aliquot<br>47/RLL-P  |
| GSE32538 | GSM806571 | Control | NJ004840 | Lung | Aliquote<br>66/RLL-P |
| GSE32538 | GSM806572 | Control | NJ004847 | Lung | Aliquot<br>41/LLL-P  |
| GSE32538 | GSM806573 | Control | NJ004851 | Lung | Aliquot<br>1/LLL-C   |
| GSE32538 | GSM806574 | Control | NJ004860 | Lung | Aliquot<br>1/RLL-P   |
| GSE32538 | GSM806575 | Control | NJ004863 | Lung | Aliquot<br>52/RLL-P  |
| GSE32538 | GSM806576 | Control | NJ020000 | Lung | Aliquot<br>6/LLL-P   |
| GSE32538 | GSM806577 | Control | NJ020001 | Lung | R Lower              |
| GSE32538 | GSM806578 | Control | NJ020002 | Lung | Aliquot<br>1/RLL-P   |
| GSE32538 | GSM806579 | Control | NJ020003 | Lung | Aliquot<br>1/RLL-P   |
| GSE32538 | GSM806580 | Control | NJ020005 | Lung | Aliquot<br>1/RLL-P   |
| GSE32538 | GSM806581 | Control | NJ020006 | Lung | Aliquot              |

|          |           |         |          |      |                     |
|----------|-----------|---------|----------|------|---------------------|
|          |           |         |          |      | 1/RLL-P             |
| GSE32538 | GSM806582 | Control | NJ020007 | Lung | Aliquot<br>1/RLL-P  |
| GSE32538 | GSM806583 | Control | NJ020011 | Lung | Aliquot<br>1/RLL-P  |
| GSE32538 | GSM806584 | Control | NJ020012 | Lung | Aliquot<br>6/LLL-P  |
| GSE32538 | GSM806585 | Control | NJ020015 | Lung | Aliquot<br>7/LLL-P  |
| GSE32538 | GSM806586 | Control | NJ020016 | Lung | Aliquot<br>1/RLL-P  |
| GSE32538 | GSM806587 | Control | NJ020022 | Lung | Aliquot<br>37/LLL   |
| GSE32538 | GSM806588 | Control | NJ020025 | Lung | Aliquot<br>1/LLL-P  |
| GSE32538 | GSM806589 | Control | NJ020026 | Lung | Aliquot<br>1/LLL-P  |
| GSE32538 | GSM806590 | Control | NJ020027 | Lung | Aliquot<br>67/RLL   |
| GSE32538 | GSM806591 | Control | NJ020028 | Lung | Aliquot<br>37/RLL-P |
| GSE32538 | GSM806592 | Control | NJ020032 | Lung | Aliquot<br>62/RLL-P |
| GSE32538 | GSM806593 | Control | NJ020036 | Lung | Aliquot<br>70/LLL-P |
| GSE32538 | GSM806594 | Control | NJ020040 | Lung | Aliquot<br>7/RLL-C  |
| GSE32538 | GSM806595 | Control | NJ020042 | Lung | Aliquot             |

|          |           |         |          |      |                    |
|----------|-----------|---------|----------|------|--------------------|
|          |           |         |          |      | 2/RLL-P            |
| GSE32538 | GSM806596 | Control | NJ020044 | Lung | Aliquot<br>2/RLL-P |
| GSE32538 | GSM806597 | Control | NJ020045 | Lung | Aliquot<br>3/RLL-P |
| GSE32538 | GSM806598 | Control | NJ020049 | Lung | Aliquot<br>1/RLL-P |
| GSE32538 | GSM806599 | Control | NJ020051 | Lung | Aliquot<br>74/RLL  |
| GSE32538 | GSM806600 | Control | NJ020053 | Lung | Aliquot<br>1/RLL-P |
| GSE32538 | GSM806601 | Control | NJ020055 | Lung | R Lower            |
| GSE32538 | GSM806602 | Control | NJ020056 | Lung | Aliquot<br>1/RLL-P |
| GSE32538 | GSM806603 | Control | NJ020061 | Lung | Aliquot<br>1/RLL-P |
| GSE32538 | GSM806604 | Control | NJ020063 | Lung | Aliquot<br>1/RLL-P |
| GSE32538 | GSM806605 | Control | NJ020064 | Lung | Aliquot<br>30/RLL  |
| GSE32538 | GSM806606 | Control | NJ020065 | Lung | Aliquot<br>1/LLL-P |
| GSE32538 | GSM806607 | Control | NJ020066 | Lung | Aliquot<br>30/RLL  |
| GSE32538 | GSM806608 | Control | NJ020079 | Lung | Aliquot<br>1/RLL-C |
| GSE32538 | GSM806609 | Control | NJ020080 | Lung | Aliquot<br>14/RML- |



|          |           |         |          |      | P                       |
|----------|-----------|---------|----------|------|-------------------------|
| GSE32538 | GSM806610 | Control | NJ020081 | Lung | Aliquot<br>24/RML       |
| GSE32538 | GSM806611 | Control | NJ020083 | Lung | Aliquot<br>10/RML-<br>C |
| GSE32538 | GSM806612 | Control | NJ020343 | Lung | Aliquot 1               |
| GSE32538 | GSM806421 | IPF/UIP | LT000216 | Lung | L Lower                 |
| GSE32538 | GSM806422 | IPF/UIP | LT001600 | Lung | R Lower                 |
| GSE32538 | GSM806424 | IPF/UIP | LT002902 | Lung | R Lower                 |
| GSE32538 | GSM806425 | IPF/UIP | LT004173 | Lung | L Lower                 |
| GSE32538 | GSM806426 | IPF/UIP | LT006783 | Lung | R Lower                 |
| GSE32538 | GSM806427 | IPF/UIP | LT006946 | Lung | R Lower                 |
| GSE32538 | GSM806429 | IPF/UIP | LT008069 | Lung | R Lower                 |
| GSE32538 | GSM806431 | IPF/UIP | LT009429 | Lung | R Lower                 |
| GSE32538 | GSM806433 | IPF/UIP | LT019699 | Lung | R Lower                 |
| GSE32538 | GSM806434 | IPF/UIP | LT025724 | Lung | L Lower                 |
| GSE32538 | GSM806435 | IPF/UIP | LT030385 | Lung | R Lower                 |
| GSE32538 | GSM806437 | IPF/UIP | LT033422 | Lung | R Lower                 |
| GSE32538 | GSM806438 | IPF/UIP | LT039091 | Lung | R Lower                 |
| GSE32538 | GSM806439 | IPF/UIP | LT046539 | Lung | R Lower                 |
| GSE32538 | GSM806440 | IPF/UIP | LT047521 | Lung | R Lower                 |
| GSE32538 | GSM806441 | IPF/UIP | LT056301 | Lung | L Upper                 |
| GSE32538 | GSM806442 | IPF/UIP | LT056464 | Lung | R Lower                 |
| GSE32538 | GSM806444 | IPF/UIP | LT059846 | Lung | R Lower                 |
| GSE32538 | GSM806445 | IPF/UIP | LT062796 | Lung | L Lower                 |
| GSE32538 | GSM806446 | IPF/UIP | LT062911 | Lung | L Upper                 |
| GSE32538 | GSM806447 | IPF/UIP | LT063974 | Lung | L Lower                 |
| GSE32538 | GSM806448 | IPF/UIP | LT067200 | Lung | L Upper                 |
| GSE32538 | GSM806449 | IPF/UIP | LT067836 | Lung | R Lower                 |
| GSE32538 | GSM806450 | IPF/UIP | LT069422 | Lung | R Lower                 |
| GSE32538 | GSM806451 | IPF/UIP | LT071706 | Lung | R Middle                |
| GSE32538 | GSM806452 | IPF/UIP | LT072789 | Lung | R Upper                 |

|          |           |         |          |      |          |
|----------|-----------|---------|----------|------|----------|
| GSE32538 | GSM806453 | IPF/UIP | LT074868 | Lung | R Lower  |
| GSE32538 | GSM806457 | IPF/UIP | LT080836 | Lung | R Middle |
| GSE32538 | GSM806460 | IPF/UIP | LT087826 | Lung | L Upper  |
| GSE32538 | GSM806461 | IPF/UIP | LT089958 | Lung | R Lower  |
| GSE32538 | GSM806462 | IPF/UIP | LT090283 | Lung | L Lower  |
| GSE32538 | GSM806463 | IPF/UIP | LT091552 | Lung | L Lower  |
| GSE32538 | GSM806464 | IPF/UIP | LT092669 | Lung | L Lower  |
| GSE32538 | GSM806465 | IPF/UIP | LT093665 | Lung | L Ling   |
| GSE32538 | GSM806467 | IPF/UIP | LT095103 | Lung | L Lower  |
| GSE32538 | GSM806468 | IPF/UIP | LT098394 | Lung | R Lower  |
| GSE32538 | GSM806469 | IPF/UIP | LT099826 | Lung | L Lower  |
| GSE32538 | GSM806470 | IPF/UIP | LT100434 | Lung | L Upper  |
| GSE32538 | GSM806471 | IPF/UIP | LT100821 | Lung | R Lower  |
| GSE32538 | GSM806472 | IPF/UIP | LT101536 | Lung | L Lower  |
| GSE32538 | GSM806473 | IPF/UIP | LT103266 | Lung | R Lower  |
| GSE32538 | GSM806474 | IPF/UIP | LT104717 | Lung | R Lower  |
| GSE32538 | GSM806477 | IPF/UIP | LT109321 | Lung | R Lower  |
| GSE32538 | GSM806478 | IPF/UIP | LT116459 | Lung | L Lower  |
| GSE32538 | GSM806481 | IPF/UIP | LT119242 | Lung | R Lower  |
| GSE32538 | GSM806482 | IPF/UIP | LT128191 | Lung | L Lower  |
| GSE32538 | GSM806483 | IPF/UIP | LT128262 | Lung | R Upper  |
| GSE32538 | GSM806484 | IPF/UIP | LT134279 | Lung | L Lower  |
| GSE32538 | GSM806485 | IPF/UIP | LT134302 | Lung | L Lower  |
| GSE32538 | GSM806486 | IPF/UIP | LT134776 | Lung | L Lower  |
| GSE32538 | GSM806488 | IPF/UIP | LT137431 | Lung | R Lower  |
| GSE32538 | GSM806490 | IPF/UIP | LT144921 | Lung | L Lower  |
| GSE32538 | GSM806491 | IPF/UIP | LT150445 | Lung | R Lower  |
| GSE32538 | GSM806493 | IPF/UIP | LT154952 | Lung | R Lower  |
| GSE32538 | GSM806494 | IPF/UIP | LT156276 | Lung | R Lower  |
| GSE32538 | GSM806495 | IPF/UIP | LT157253 | Lung | R Lower  |
| GSE32538 | GSM806496 | IPF/UIP | LT159457 | Lung | L Lower  |
| GSE32538 | GSM806498 | IPF/UIP | LT163953 | Lung | R Lower  |
| GSE32538 | GSM806499 | IPF/UIP | LT165736 | Lung | L Lower  |
| GSE32538 | GSM806500 | IPF/UIP | LT167906 | Lung | L Lower  |

|          |           |         |          |      |          |
|----------|-----------|---------|----------|------|----------|
| GSE32538 | GSM806501 | IPF/UIP | LT168219 | Lung | R Lower  |
| GSE32538 | GSM806502 | IPF/UIP | LT168352 | Lung | L Lower  |
| GSE32538 | GSM806503 | IPF/UIP | LT173946 | Lung | R Lower  |
| GSE32538 | GSM806504 | IPF/UIP | LT175399 | Lung | R Upper  |
| GSE32538 | GSM806505 | IPF/UIP | LT180758 | Lung | R Middle |
| GSE32538 | GSM806506 | IPF/UIP | LT182067 | Lung | R Lower  |
| GSE32538 | GSM806507 | IPF/UIP | LT182636 | Lung | R Lower  |
| GSE32538 | GSM806510 | IPF/UIP | LT185396 | Lung | R Lower  |
| GSE32538 | GSM806511 | IPF/UIP | LT187987 | Lung | L Lower  |
| GSE32538 | GSM806512 | IPF/UIP | LT188467 | Lung | L Lower  |
| GSE32538 | GSM806513 | IPF/UIP | LT188524 | Lung | R Lower  |
| GSE32538 | GSM806515 | IPF/UIP | LT194091 | Lung | R Lower  |
| GSE32538 | GSM806517 | IPF/UIP | LT195192 | Lung | R Lower  |
| GSE32538 | GSM806518 | IPF/UIP | LT196309 | Lung | R Lower  |
| GSE32538 | GSM806519 | IPF/UIP | LT197286 | Lung | L Upper  |
| GSE32538 | GSM806520 | IPF/UIP | LT198096 | Lung | L Lower  |
| GSE32538 | GSM806521 | IPF/UIP | LT201348 | Lung | L Upper  |
| GSE32538 | GSM806524 | IPF/UIP | LT205601 | Lung | R Lower  |
| GSE32538 | GSM806526 | IPF/UIP | LT206005 | Lung | R Lower  |
| GSE32538 | GSM806527 | IPF/UIP | LT207236 | Lung | R Middle |
| GSE32538 | GSM806529 | IPF/UIP | LT211379 | Lung | R Lower  |
| GSE32538 | GSM806530 | IPF/UIP | LT211455 | Lung | L Upper  |
| GSE32538 | GSM806532 | IPF/UIP | LT217339 | Lung | R Middle |
| GSE32538 | GSM806533 | IPF/UIP | LT219681 | Lung | R Lower  |
| GSE32538 | GSM806534 | IPF/UIP | LT221381 | Lung | R Lower  |
| GSE32538 | GSM806535 | IPF/UIP | LT228897 | Lung | L Lower  |
| GSE32538 | GSM806536 | IPF/UIP | LT230142 | Lung | R Lower  |
| GSE32538 | GSM806538 | IPF/UIP | LT231373 | Lung | L Upper  |
| GSE32538 | GSM806539 | IPF/UIP | LT235441 | Lung | R Lower  |
| GSE32538 | GSM806541 | IPF/UIP | LT242161 | Lung | R Lower  |
| GSE32538 | GSM806542 | IPF/UIP | LT244824 | Lung | R Lower  |
| GSE32538 | GSM806544 | IPF/UIP | LT258372 | Lung | R Lower  |
| GSE32538 | GSM806546 | IPF/UIP | LT263234 | Lung | R Lower  |
| GSE32538 | GSM806548 | IPF/UIP | LT264690 | Lung | L Upper  |

|                                                                           |           |             |                                        |      |          |
|---------------------------------------------------------------------------|-----------|-------------|----------------------------------------|------|----------|
| GSE32538                                                                  | GSM806549 | IPF/UIP     | LT266377                               | Lung | R Lower  |
| GSE32538                                                                  | GSM806550 | IPF/UIP     | LT266817                               | Lung | L Lower  |
| GSE32538                                                                  | GSM806551 | IPF/UIP     | LT269381                               | Lung | R Upper  |
| GSE32538                                                                  | GSM806552 | IPF/UIP     | LT269763                               | Lung | R Lower  |
| GSE32538                                                                  | GSM806554 | IPF/UIP     | LT275751                               | Lung | R Lower  |
| GSE32538                                                                  | GSM806555 | IPF/UIP     | LT280851                               | Lung | L Lower  |
| GSE32538                                                                  | GSM806556 | IPF/UIP     | LT282601                               | Lung | L Upper  |
| GSE32538                                                                  | GSM806557 | IPF/UIP     | LT284326                               | Lung | R Lower  |
| GSE32538                                                                  | GSM806558 | IPF/UIP     | LT284489                               | Lung | L Lower  |
| GSE32538                                                                  | GSM806560 | IPF/UIP     | LT287909                               | Lung | L Ling   |
| GSE32538                                                                  | GSM806561 | IPF/UIP     | LT295133                               | Lung | L Lower  |
| GSE32538                                                                  | GSM806562 | IPF/UIP     | LT298606                               | Lung | R Middle |
| <b>GSE16538 (6 Sarcoidosis, 6 Control) Gene Microarray Crouser et al.</b> |           |             |                                        |      |          |
| GSE16538                                                                  | GSM415386 | Control     | Lung-normal-rep1                       | Lung | Lung     |
| GSE16538                                                                  | GSM415387 | Control     | Lung-normal-rep2                       | Lung | Lung     |
| GSE16538                                                                  | GSM415388 | Control     | Lung-normal-rep3                       | Lung | Lung     |
| GSE16538                                                                  | GSM415389 | Control     | Lung-normal-rep4                       | Lung | Lung     |
| GSE16538                                                                  | GSM415390 | Control     | Lung-normal-rep5                       | Lung | Lung     |
| GSE16538                                                                  | GSM415391 | Control     | Lung-normal-rep6                       | Lung | Lung     |
| GSE16538                                                                  | GSM415392 | Sarcoidosis | Lung-Sarcoidosis-rep1                  | Lung | Lung     |
| GSE16538                                                                  | GSM415393 | Sarcoidosis | Lung-Sarcoidosis-rep2                  | Lung | Lung     |
| GSE16538                                                                  | GSM415394 | Sarcoidosis | Lung-Sarcoidosis-rep3                  | Lung | Lung     |
| GSE16538                                                                  | GSM415395 | Sarcoidosis | Lung-Sarcoidosis-rep4                  | Lung | Lung     |
| GSE16538                                                                  | GSM415396 | Sarcoidosis | Lung-Sarcoidosis-rep5                  | Lung | Lung     |
| GSE16538                                                                  | GSM415397 | Sarcoidosis | Lung-Sarcoidosis-rep6                  | Lung | Lung     |
| <b>GSE19976 (15 Sarcoidosis) Gene Microarray Lockstone et al.</b>         |           |             |                                        |      |          |
| GSE19976                                                                  | GSM499117 | Sarcoidosis | Lung_self-<br>limiting_biological_rep1 | Lung | Lung     |
| GSE19976                                                                  | GSM499118 | Sarcoidosis | Lung_self-<br>limiting_biological_rep2 | Lung | Lung     |
| GSE19976                                                                  | GSM499119 | Sarcoidosis | Lung_self-<br>limiting_biological_rep3 | Lung | Lung     |
| GSE19976                                                                  | GSM499120 | Sarcoidosis | Lung_self-                             | Lung | Lung     |

|                                                      |           |             |                                        |      |      |
|------------------------------------------------------|-----------|-------------|----------------------------------------|------|------|
|                                                      |           |             | limiting_biological_rep4               |      |      |
| GSE19976                                             | GSM499121 | Sarcoidosis | Lung_self-<br>limiting_biological_rep5 | Lung | Lung |
| GSE19976                                             | GSM499122 | Sarcoidosis | Lung_self-<br>limiting_biological_rep6 | Lung | Lung |
| GSE19976                                             | GSM499123 | Sarcoidosis | Lung_self-<br>limiting_biological_rep7 | Lung | Lung |
| GSE19976                                             | GSM499124 | Sarcoidosis | Lung_self-<br>limiting_biological_rep8 | Lung | Lung |
| GSE19976                                             | GSM499125 | Sarcoidosis | Lung_Progressive_biologic<br>al_rep1   | Lung | Lung |
| GSE19976                                             | GSM499126 | Sarcoidosis | Lung_Progressive_biologic<br>al_rep2   | Lung | Lung |
| GSE19976                                             | GSM499127 | Sarcoidosis | Lung_Progressive_biologic<br>al_rep3   | Lung | Lung |
| GSE19976                                             | GSM499128 | Sarcoidosis | Lung_Progressive_biologic<br>al_rep4   | Lung | Lung |
| GSE19976                                             | GSM499129 | Sarcoidosis | Lung_Progressive_biologic<br>al_rep5   | Lung | Lung |
| GSE19976                                             | GSM499130 | Sarcoidosis | Lung_Progressive_biologic<br>al_rep6   | Lung | Lung |
| GSE19976                                             | GSM499131 | Sarcoidosis | Lung_Progressive_biologic<br>al_rep7   | Lung | Lung |
| <b>GSE5774 (12 NSIP) Gene Microarray Yang et al.</b> |           |             |                                        |      |      |
| GSE5774                                              | GSM133542 | NSIP        | F-IIP(NSIP)1_Cy3                       | Lung | Lung |
| GSE5774                                              | GSM133544 | NSIP        | F-IIP(NSIP)1_Cy5                       | Lung | Lung |
| GSE5774                                              | GSM133547 | NSIP        | F-IIP(NSIP)2_Cy3                       | Lung | Lung |
| GSE5774                                              | GSM133548 | NSIP        | F-IIP(NSIP)2_Cy5                       | Lung | Lung |
| GSE5774                                              | GSM133674 | NSIP        | S-IIP(NSIP)1_Cy3                       | Lung | Lung |
| GSE5774                                              | GSM133675 | NSIP        | S-IIP(NSIP)1_Cy5                       | Lung | Lung |

|         |           |      |                   |      |      |
|---------|-----------|------|-------------------|------|------|
| GSE5774 | GSM133680 | NSIP | F-IIP(NSIP)3_Cy3  | Lung | Lung |
| GSE5774 | GSM133682 | NSIP | F-IIP(NSIP)3_Cy5  | Lung | Lung |
| GSE5774 | GSM134673 | NSIP | S-IIP(NSIP)10_Cy3 | Lung | Lung |
| GSE5774 | GSM134674 | NSIP | S-IIP(NSIP)10_Cy5 | Lung | Lung |
| GSE5774 | GSM134675 | NSIP | F-IIP(NSIP)5_Cy3  | Lung | Lung |
| GSE5774 | GSM134676 | NSIP | F-IIP(NSIP)5_Cy5  | Lung | Lung |

## References:

1. Sing, T., Sander, O., Beerenwinkel, N. & Lengauer, T. ROCR: visualizing classifier performance in R. *Bioinformatics* 21, 3940–3941 (2005).
2. Yoshioka, H. et al. In vivo therapeutic effect of CDH3/P-cadherin-targeting radioimmunotherapy. *Cancer Immunol. Immunother.* 61, 1211–1220 (2012).
3. He, W. et al. Exogenously administered secreted frizzled related protein 2 (Sfrp2) reduces fibrosis and improves cardiac function in a rat model of myocardial infarction. *Proc. Natl. Acad. Sci. U.S.A.* 107, 21110–21115 (2010).
4. Vuga, L. J. et al. WNT5A Is a Regulator of Fibroblast Proliferation and Resistance to Apoptosis. *Am J Respir Cell Mol Biol* 41, 583–589 (2009).
5. Burkhardt, A. M. et al. CXCL17 Is a Mucosal Chemokine Elevated in Idiopathic Pulmonary Fibrosis That Exhibits Broad Antimicrobial Activity. *J Immunol* 188, 6399–6406 (2012).
6. P, C. & J, P. Regulatory Roles of Dclk1 in Epithelial Mesenchymal Transition and Cancer

- Stem Cells. *Journal of Carcinogenesis & Mutagenesis* 7, (2016).
7. Guoying Yu et al. in C68. OLD AND NEW PATHWAYS TO PULMONARY FIBROSIS A4932–A4932 (American Thoracic Society, 2012).
  8. Bauer, Y. et al. A novel genomic signature with translational significance for human idiopathic pulmonary fibrosis. *Am. J. Respir. Cell Mol. Biol.* 52, 217–231 (2015).
  9. Arderiu, G., Espinosa, S., Peña, E., Aledo, R. & Badimon, L. Monocyte-secreted Wnt5a interacts with FZD5 in microvascular endothelial cells and induces angiogenesis through tissue factor signaling. *J Mol Cell Biol* 6, 380–393 (2014).
  10. Leppäranta, O. et al. Regulation of TGF- $\beta$  storage and activation in the human idiopathic pulmonary fibrosis lung. *Cell Tissue Res.* 348, 491–503 (2012)
  11. Plantier, L. et al. Ectopic respiratory epithelial cell differentiation in bronchiolised distal airspaces in idiopathic pulmonary fibrosis. *Thorax* 66, 651–657 (2011).
  12. Vervoort, S. J., Lourenço, A. R., van Boxtel, R. & Coffey, P. J. SOX4 mediates TGF- $\beta$ -induced expression of mesenchymal markers during mammary cell epithelial to mesenchymal transition. *PLoS ONE* 8, e53238 (2013).
  13. Györy, I. et al. Transcription factor Ebf1 regulates differentiation stage-specific signaling, proliferation, and survival of B cells. *Genes Dev.* 26, 668–682 (2012).
  14. Micalizzi, D. S. et al. The Six1 homeoprotein induces human mammary carcinoma cells to undergo epithelial-mesenchymal transition and metastasis in mice through increasing TGF-beta signaling. *J. Clin. Invest.* 119, 2678–2690 (2009).
  15. Liu, Y., Chu, A., Chakroun, I., Islam, U. & Blais, A. Cooperation between myogenic regulatory factors and SIX family transcription factors is important for myoblast differentiation. *Nucleic Acids Res* 38, 6857–6871 (2010).
  16. Koinuma, D. *et al.* Chromatin immunoprecipitation on microarray analysis of Smad2/3

- binding sites reveals roles of ETS1 and TFAP2A in transforming growth factor beta signaling. *Mol. Cell. Biol.* **29**, 172–186 (2009).
17. Luchsinger, L. L., Patenaude, C. A., Smith, B. D. & Layne, M. D. Myocardin-related transcription factor-A complexes activate type I collagen expression in lung fibroblasts. *J. Biol. Chem.* **286**, 44116–44125 (2011).
  18. Murata, K. et al. p63 - Key molecule in the early phase of epithelial abnormality in idiopathic pulmonary fibrosis. *Exp. Mol. Pathol.* **83**, 367–376 (2007).
  19. Sho, T. et al. TRIM29 negatively regulates p53 via inhibition of Tip60. *Biochim. Biophys. Acta* **1813**, 1245–1253 (2011).
  20. Lee, K. S., Buck, M., Houghlum, K. & Chojkier, M. Activation of hepatic stellate cells by TGF alpha and collagen type I is mediated by oxidative stress through c-myc expression. *J. Clin. Invest.* **96**, 2461–2468 (1995).
  21. Yan, C. et al. CCAAT/enhancer-binding protein  $\delta$  is a critical mediator of lipopolysaccharide-induced acute lung injury. *Am. J. Pathol.* **182**, 420–430 (2013).
  22. Nakamura, T. et al. Axin, an inhibitor of the Wnt signalling pathway, interacts with beta-catenin, GSK-3beta and APC and reduces the beta-catenin level. *Genes Cells* **3**, 395–403 (1998).
  23. Königshoff, M. et al. Functional Wnt signaling is increased in idiopathic pulmonary fibrosis. *PLoS ONE* **3**, e2142 (2008).
  24. Rajasekaran, S., Vaz, M. & Reddy, S. P. Fra-1/AP-1 transcription factor negatively regulates pulmonary fibrosis in vivo. *PLoS ONE* **7**, e41611 (2012).
  25. Li, Q. F., Wang, X. R., Yang, Y. W. & Lin, H. Hypoxia upregulates hypoxia inducible factor (HIF)-3alpha expression in lung epithelial cells: characterization and comparison with HIF-1alpha. *Cell Res.* **16**, 548–558 (2006).



26. Yin, Z. et al. Hop functions downstream of Nkx2.1 and GATA6 to mediate HDAC-dependent negative regulation of pulmonary gene expression. *Am. J. Physiol. Lung Cell Mol. Physiol.* 291, L191-199 (2006).
27. Myllärniemi, M. et al. Gremlin-mediated decrease in bone morphogenetic protein signaling promotes pulmonary fibrosis. *Am. J. Respir. Crit. Care Med.* 177, 321–329 (2008).
28. Patel, N. M. et al. Pulmonary arteriole gene expression signature in idiopathic pulmonary fibrosis. *Eur. Respir. J.* 41, 1324–1330 (2013).
29. Lu, Y. et al. Kruppel-like factor 15 regulates smooth muscle response to vascular injury--brief report. *Arterioscler. Thromb. Vasc. Biol.* 30, 1550–1552 (2010).
30. Fujita, R. et al. NF-E2 p45 is important for establishing normal function of platelets. *Mol. Cell. Biol.* **33**, 2659–2670 (2013).
31. Selman, M. et al. Accelerated Variant of Idiopathic Pulmonary Fibrosis: Clinical Behavior and Gene Expression Pattern. *PLoS ONE* **2**, (2007).
32. Singh, D. et al. Altered gene expression in blood and sputum in COPD frequent exacerbators in the ECLIPSE cohort. *PLoS ONE* **9**, e107381 (2014).
33. Kuwano, K. et al. P21Waf1/Cip1/Sdi1 and p53 expression in association with DNA strand breaks in idiopathic pulmonary fibrosis. *Am. J. Respir. Crit. Care Med.* 154, 477–483 (1996).
34. Sunaga, H. et al. Deranged fatty acid composition causes pulmonary fibrosis in Elov16-deficient mice. *Nat Commun* **4**, 2563 (2013).

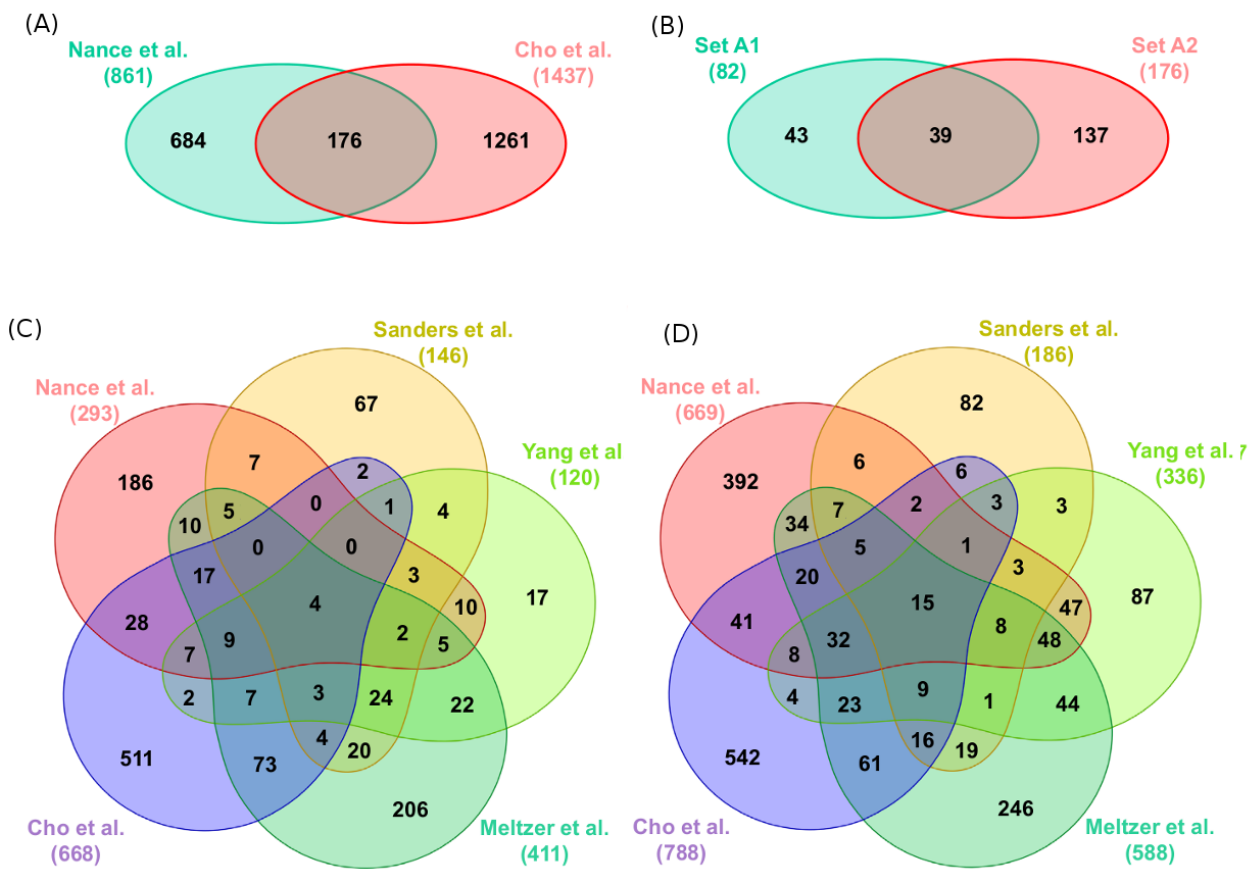

**Figure S1:** Overlap of DEGs among different experiments (A) SRP033095 and GSE21411, (B) previously reported 82 genes and 176 genes from our study, (C) Down regulated genes of GSE35147, GSE32537, GSE21411, GSE24206 and SRP033095, (D) Up regulated genes of GSE35147, GSE32537, GSE21411, GSE24206 and SRP033095

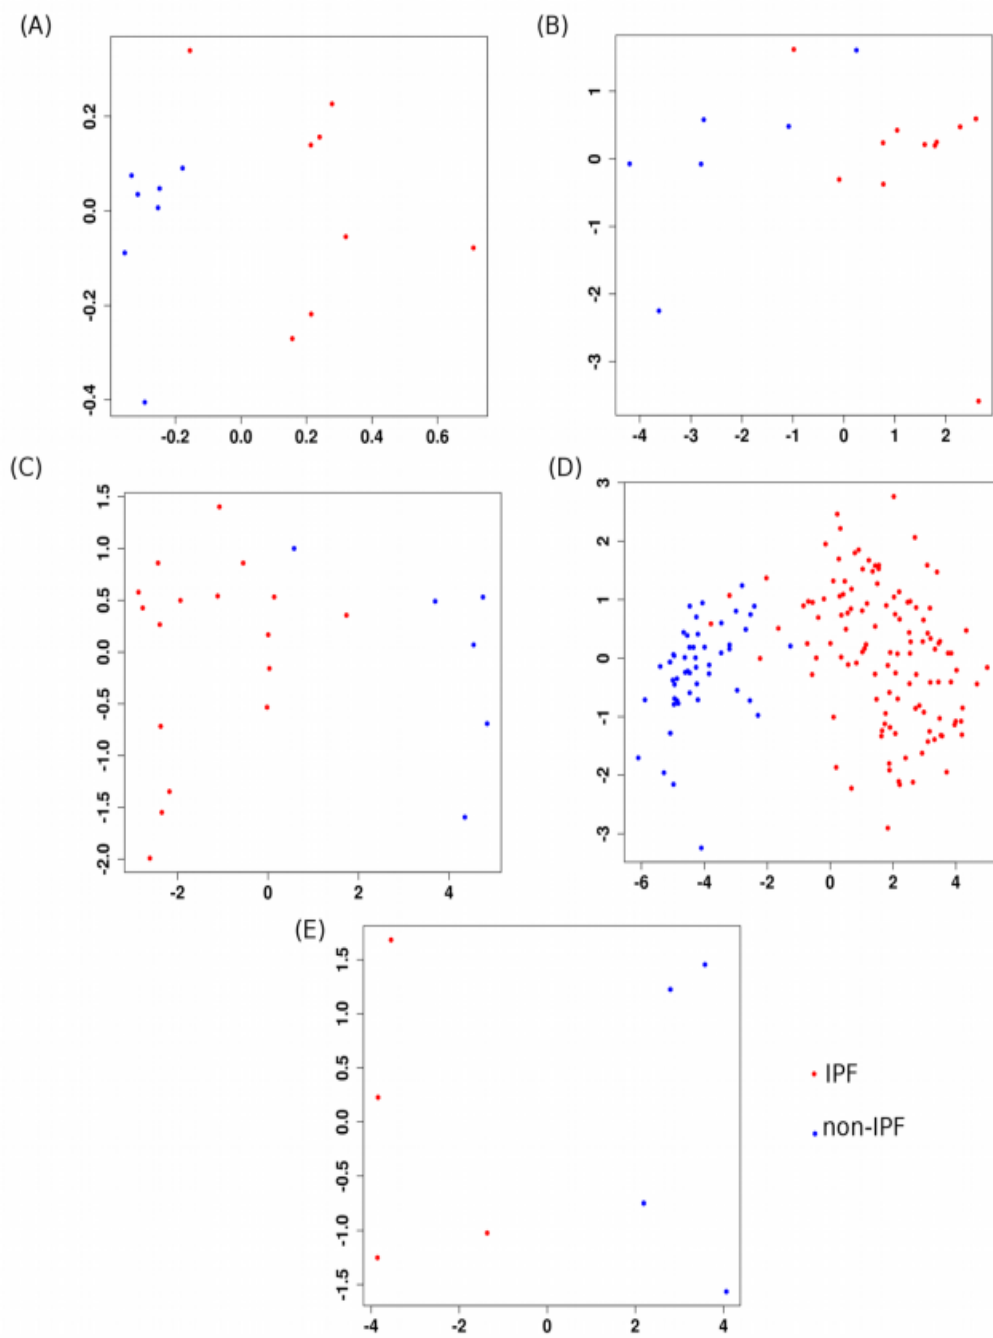

**Figure S2:** Clustering results of Set A1 for different experiments **(A)** SRP033095, **(B)** GSE21411, **(C)** GSE24206, **(D)** GSE32537, **(E)** GSE35147

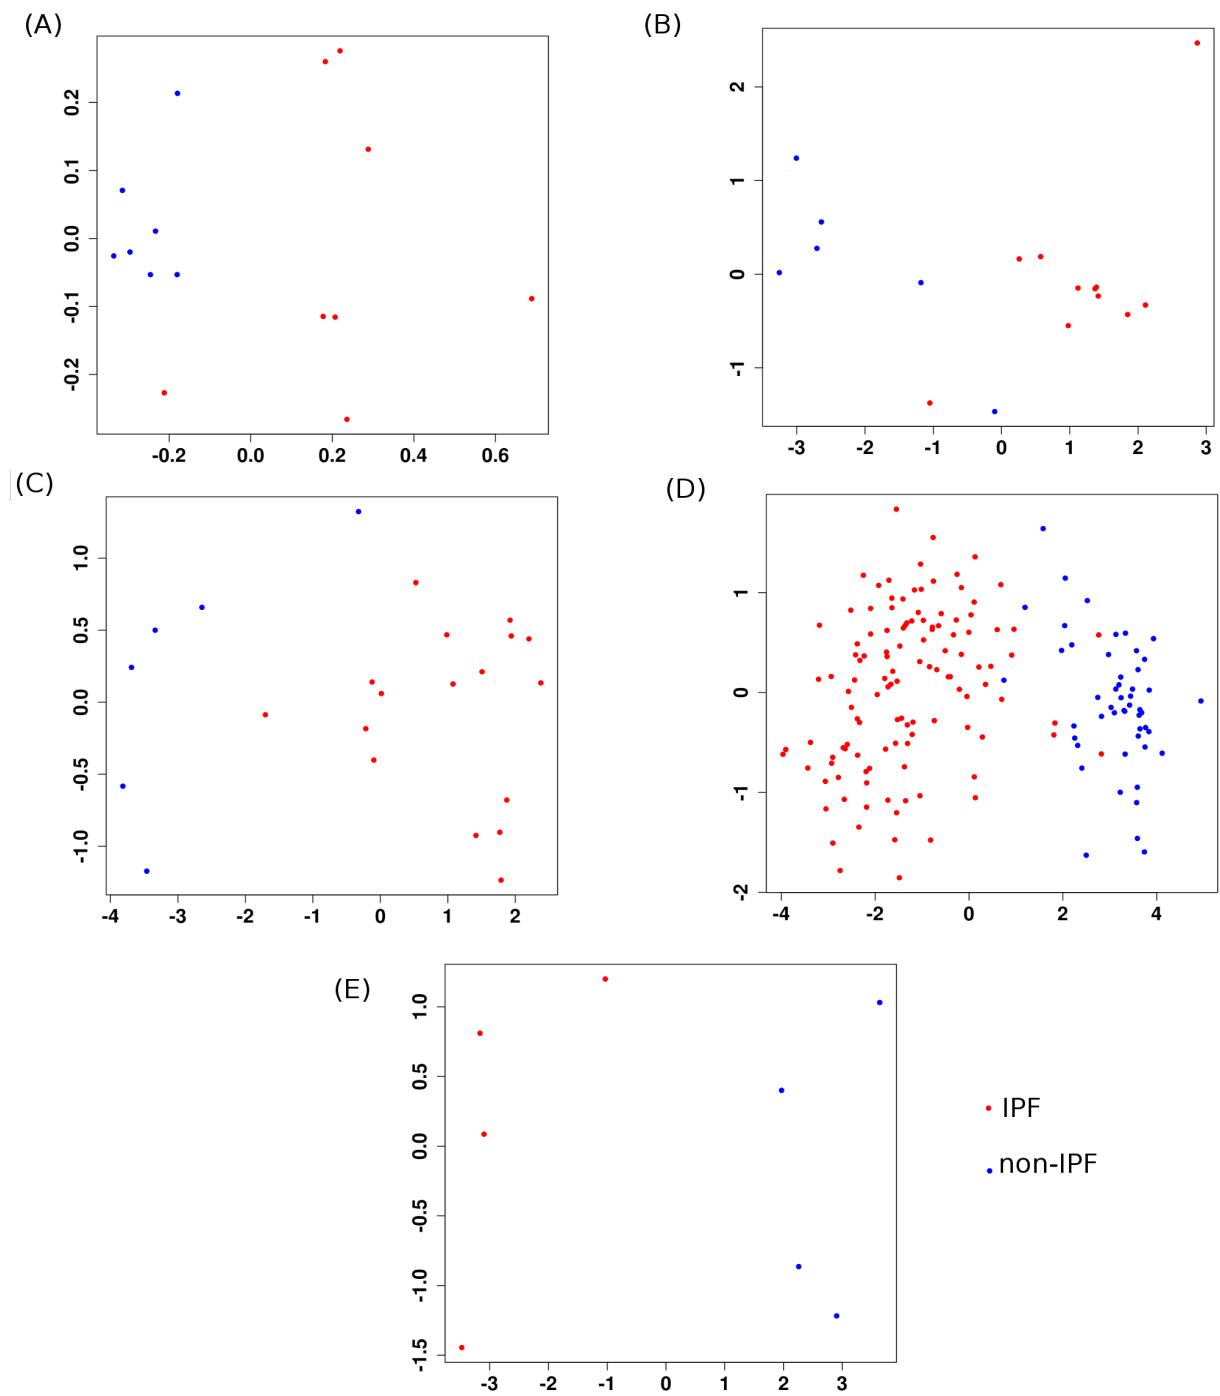

**Figure S3:** Clustering results of Set A for different experiments **(A)** SRP033095, **(B)** GSE21411, **(C)** GSE24206, **(D)** GSE32537, **(E)** GSE35147

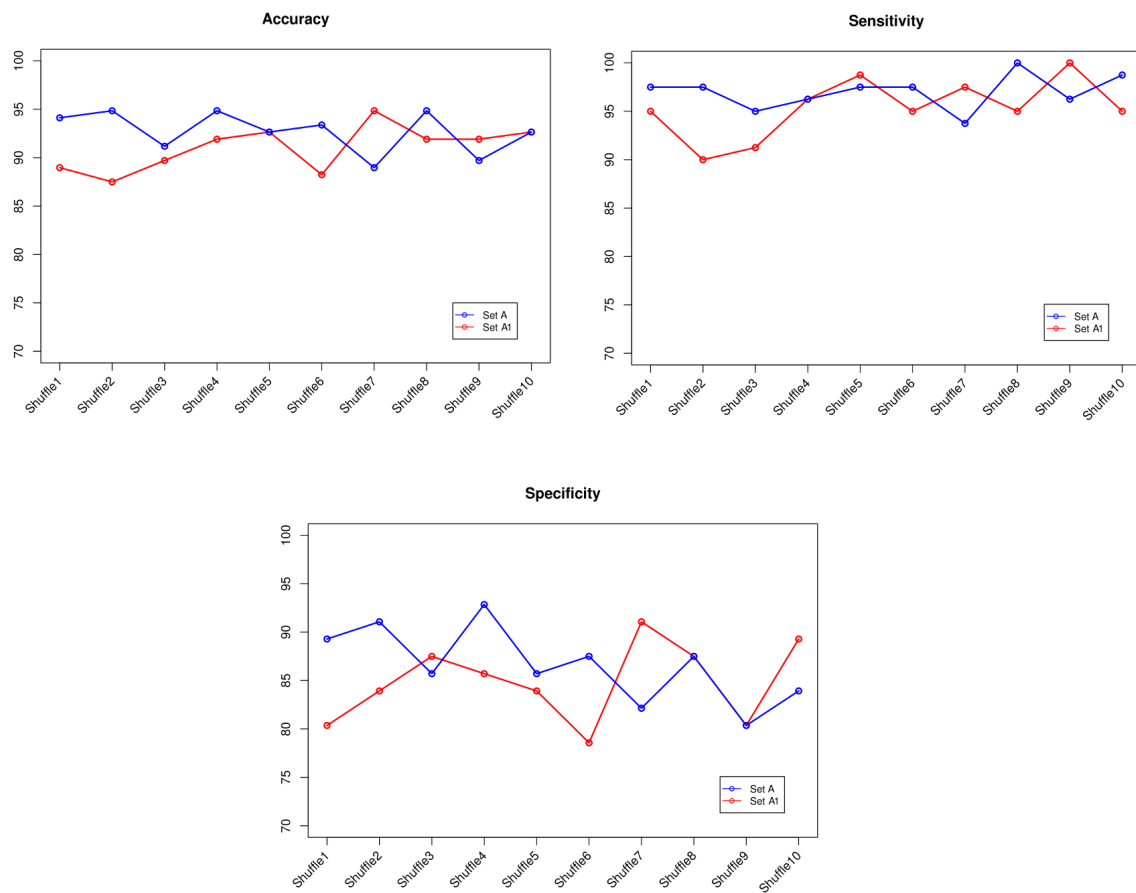

**Figure S4:** Accuracy, Sensitivity and Specificity plot for Set A and Set A1 on 10 randomized dataset models

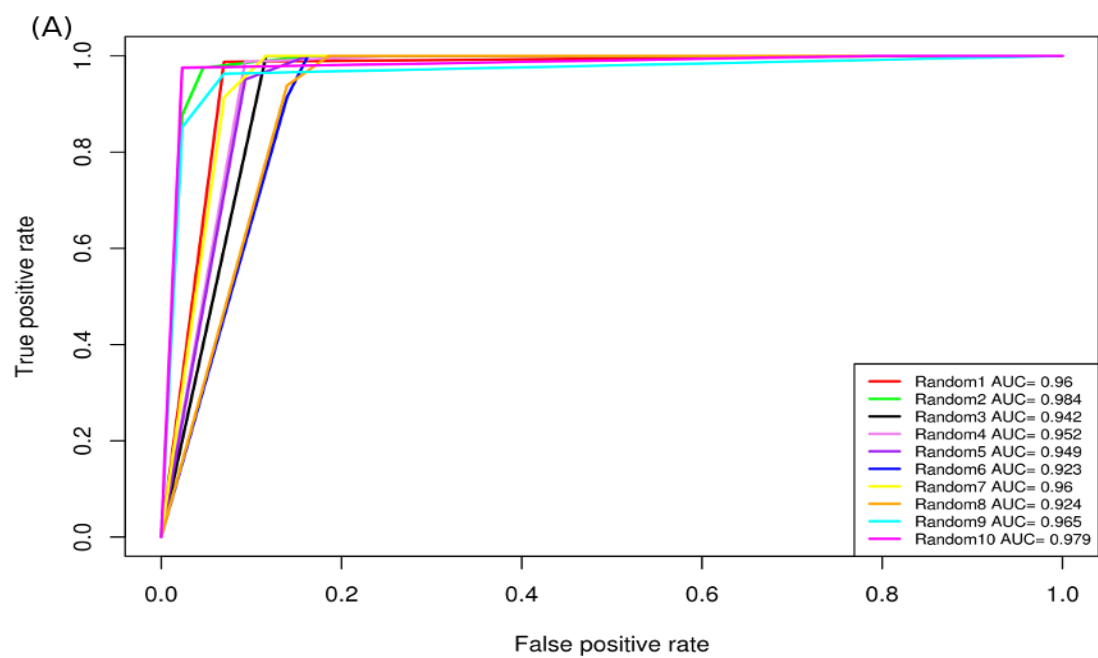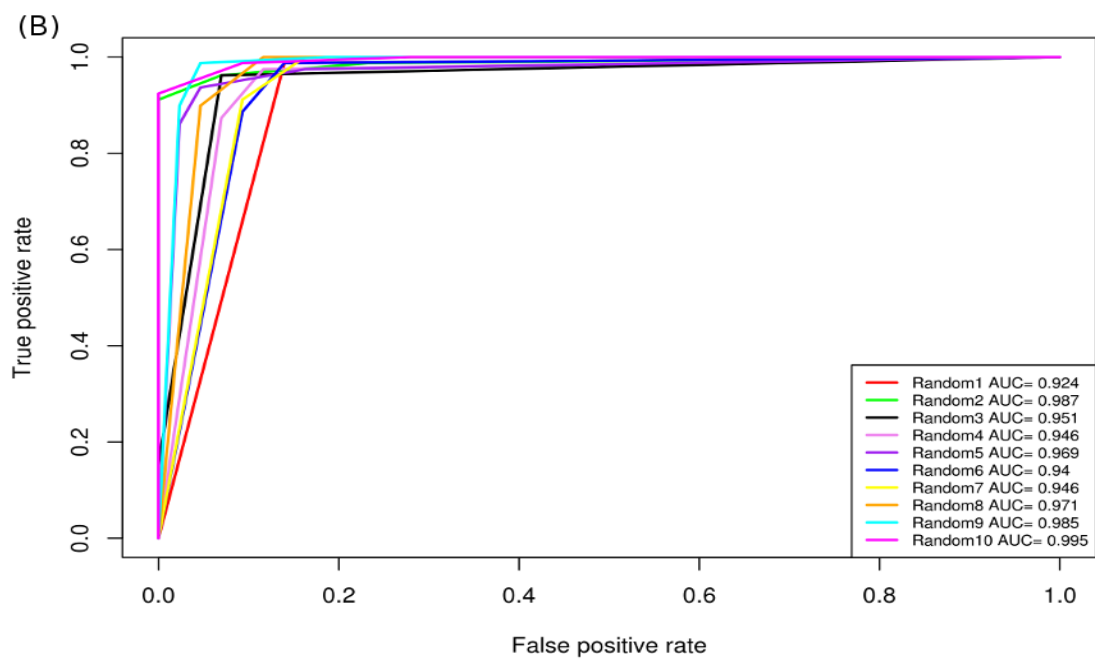

**Figure S5:** ROC plots of two gene sets against ten random models (A) Set A (B) Set A1

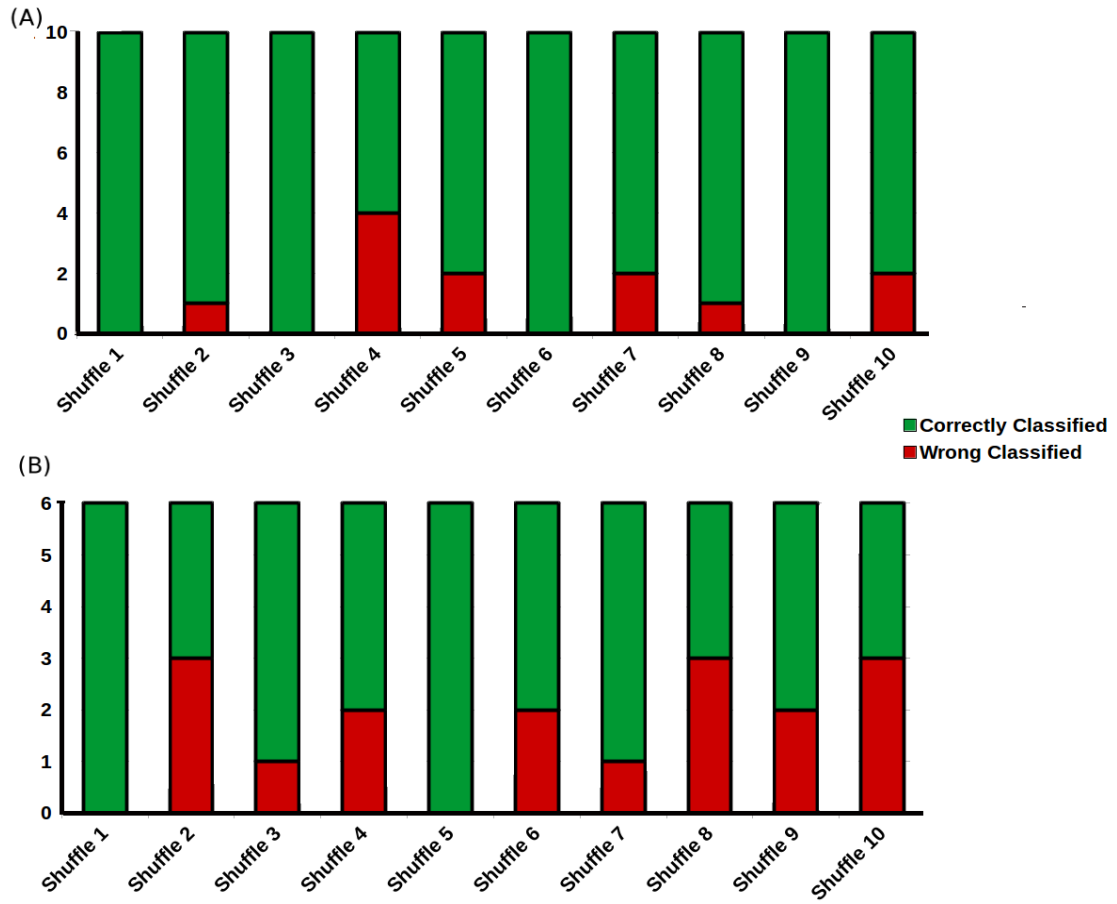

**Figure S6:** NSIP and Sarcoidosis individuals classification on 10 different models of Set A **(A)** Sarcoidosis (10 Individuals) **(B)** NSIP (6 Individuals)

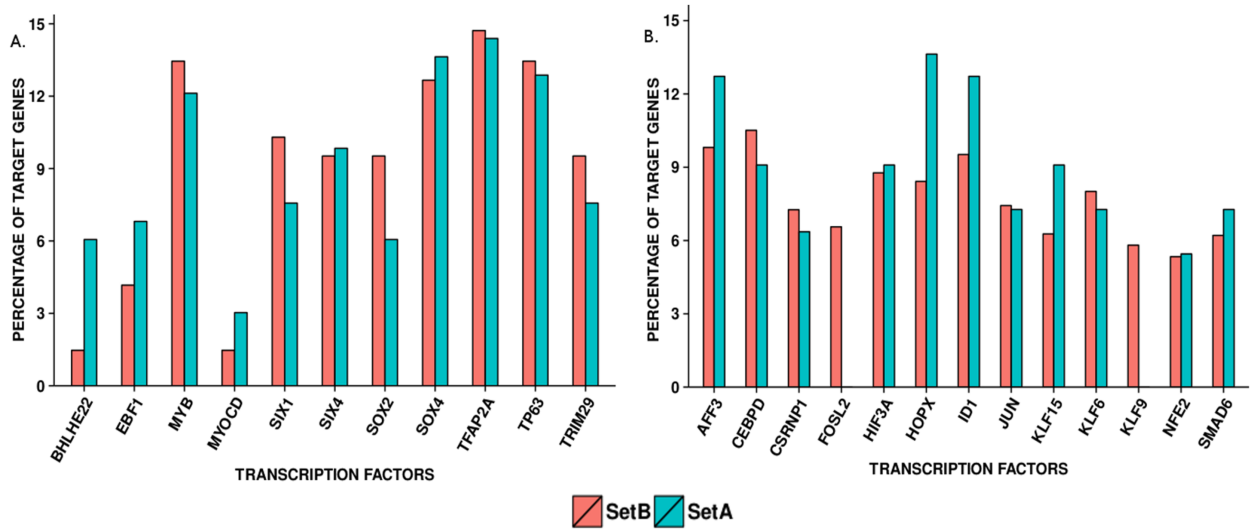

**Figure S7:** (A) Ranking of differentially expressed upregulated transcription factors regulating DEGs, (B) Ranking of differentially expressed downregulated transcription factors regulating DEGs specific to IPF



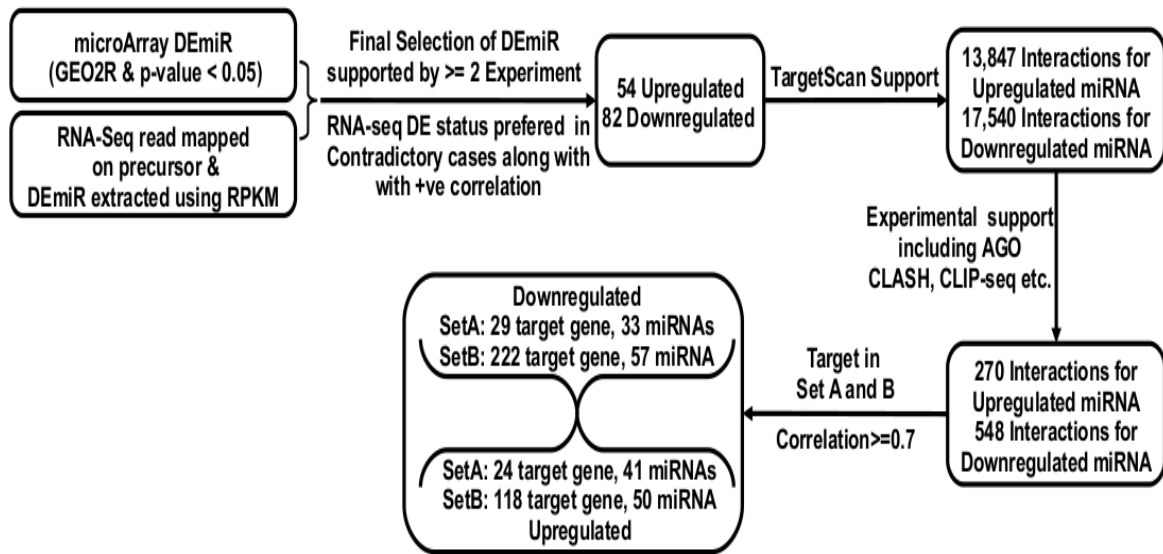

**Figure S8:** Workflow of miRNA analysis from microarray and RNA-seq study, miRNA target finding, support analysis and involvement of miRNA in different sets of genes

(A)

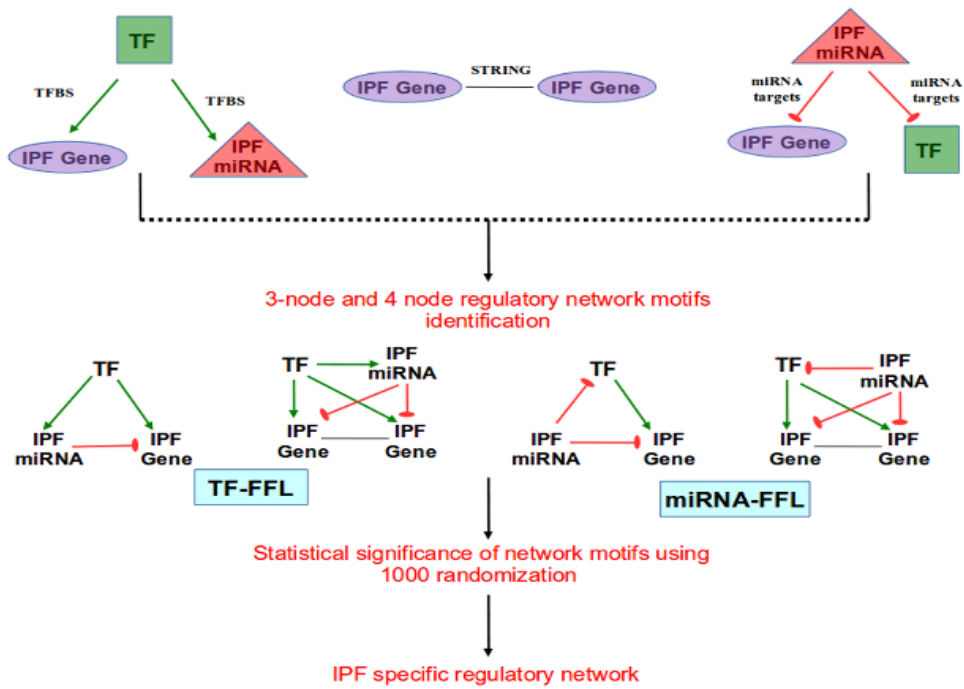

**Pipeline for construction and analysis of TF-miRNA mediated regulatory network in IPF**

(B)

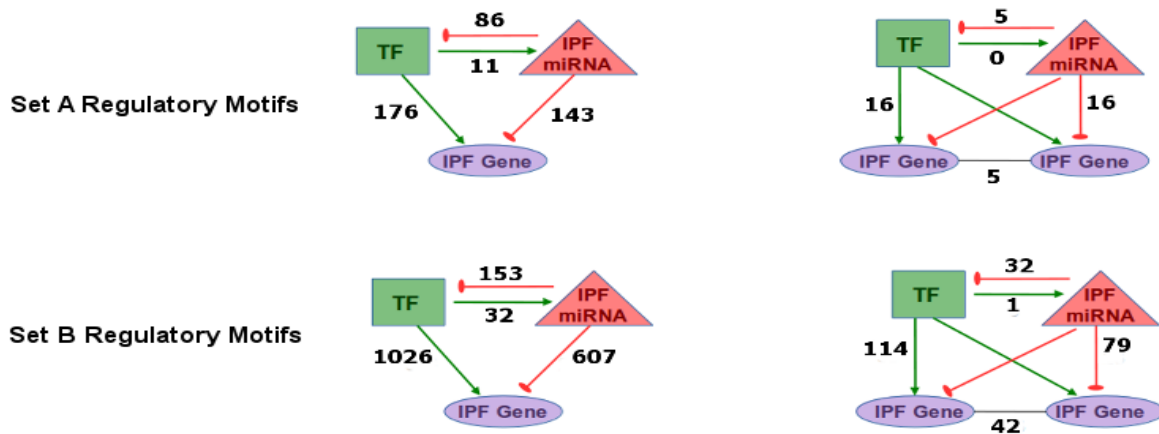

**Figure S9: (A)** Workflow for generation of various potential Feed-Forward loops and construction of TF-miRNA mediated regulatory network in IPF, **(B)** Statistics of three and four node potential FFLs for the three sets of DEGs in IPF.

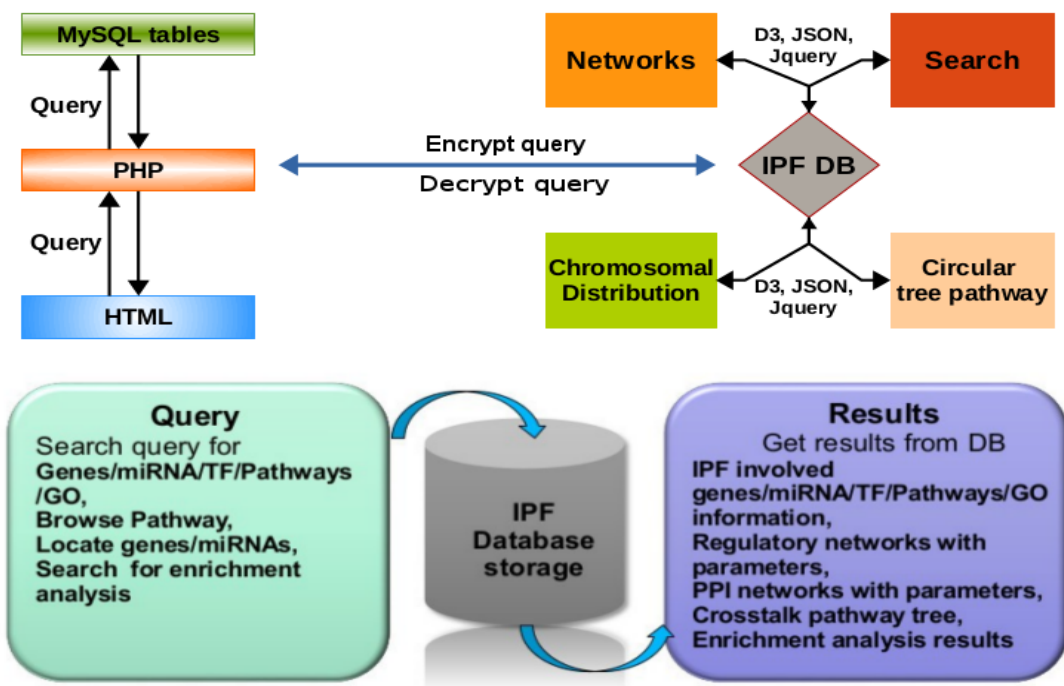

**Figure S10:** The framework and workflow of IPF portal. User input query is processed in background through PHP and MySQL and retrieved results are visualized in HTML.

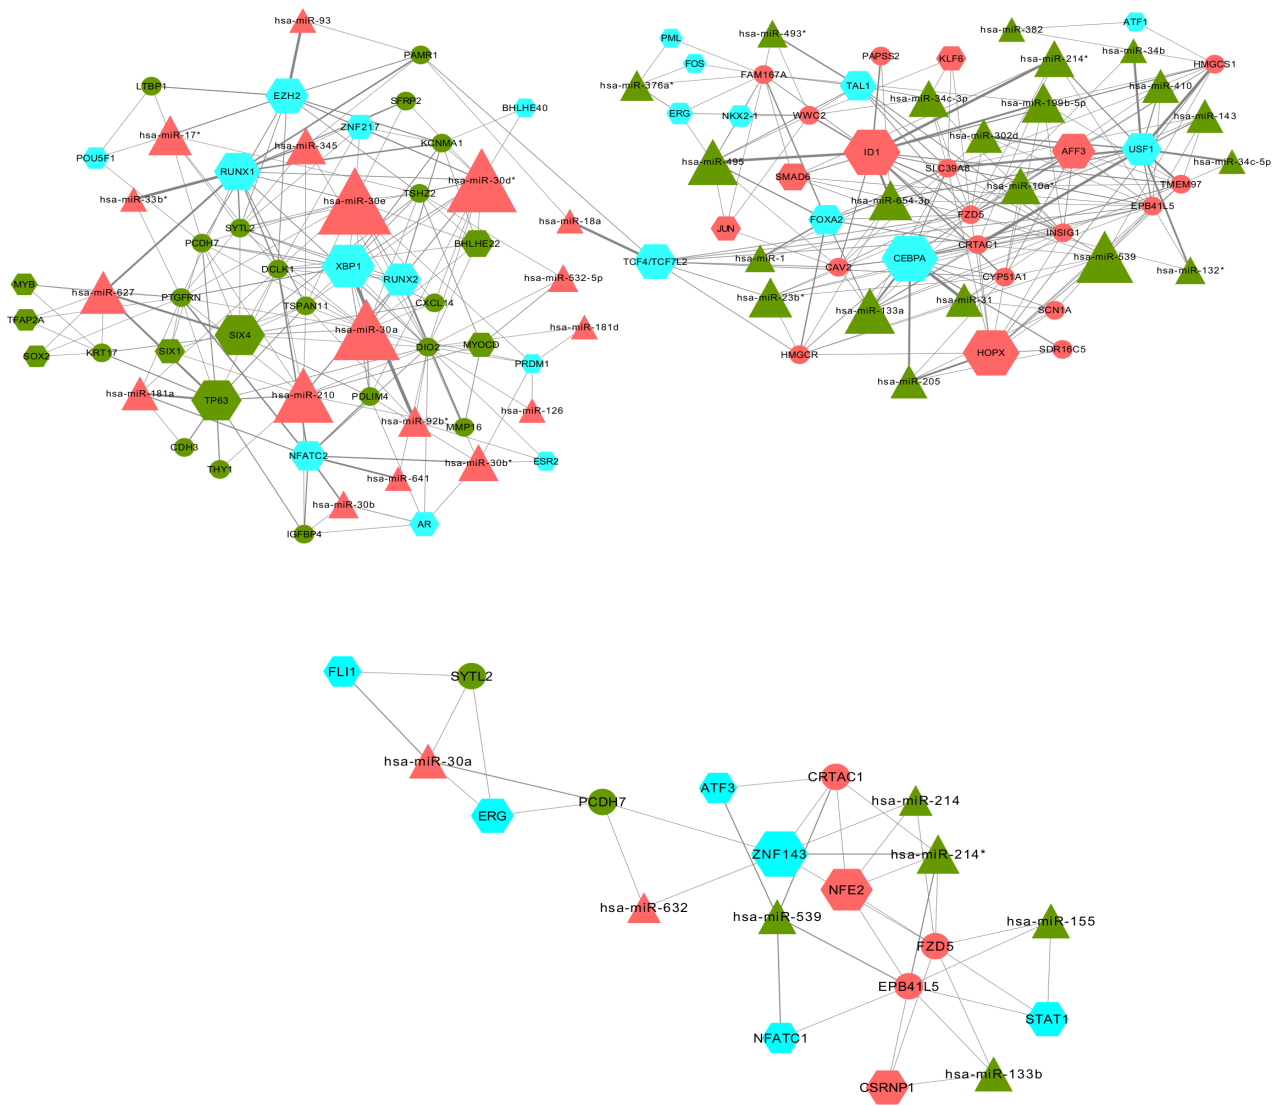

**Figure S11:** Graphical view of IPF regulatory networks generated for Set A DEGs representing important nodes in the form of IPF genes and miRNAs at each stage (down and up regulated genes and miRNAs are shown in red and green color, respectively). Edges are highlighted based on the edge betweenness and nodes size is adjusted based on outdegree. TFs are shown in sea green color and hexagon shape.
